# Supplementary material for: Phenylphosphinacalix[3]trifuran: synthesis, coordination and application in the Suzuki–Miyaura cross-coupling reaction in water
Source: Royal Society of Chemistry journal article supplement (doi:10.1039/c5ra11778j), 2015-01-01
Supplement: c5ra11778j1.pdf [file c5ra11778j1.pdf]

# Phenylphosphinacalix[3]trifuran: Synthesis, Coordination and Application in Suzuki-Miyaura cross-coupling reaction in water

Yue Sun,<sup>a</sup> Meng-Qi Yan,<sup>c</sup> Yan Liu,<sup>c</sup> Ze-Yu Lian,<sup>b</sup> Tong Meng,<sup>a</sup> Sheng-Hua Liu,<sup>a</sup> Jian Chen,<sup>a</sup> Guang-Ao Yu<sup>\*a</sup>

<sup>a</sup>Key Laboratory of Pesticide & Chemical Biology, Ministry of Education, Central China Normal University, Wuhan 430079, China. E-Mail: yuguang@mail.ccnu.edu.cn, chshliu@mail.ccnu.edu.cn

<sup>b</sup>State Key Laboratory of Elemento-Organic Chemistry, Nankai University, Tianjin 300071, China

<sup>c</sup>State Key Laboratory of Catalysis, Dalian Institute of Chemical Physics, Chinese Academy of Sciences, Dalian 116023, China

E-Mail: yuguang@mail.ccnu.edu.cn

## Table of Contents

|                                                                        |    |
|------------------------------------------------------------------------|----|
| 1. General methods and experimental details.....                       | 2  |
| 2. Table S1- Table S6.....                                             | 6  |
| 3. The X-ray structure of compounds <b>2-5</b> .....                   | 10 |
| 4. Spectra data of the products <b>2-5</b> and <b>C</b> .....          | 12 |
| 5. <sup>1</sup> H NMR spectra of Suzuki-Miyaura coupling Products..... | 34 |
| 6. References.....                                                     | 48 |

## 1. Experimental Section

### General methods and experimental details

Schlenk- and vacuum-line techniques were employed for all manipulations. All solvents were distilled from appropriate drying agents under argon before use.  $^1\text{H}$  and  $^{31}\text{P}\{^1\text{H}\}$  NMR spectra were recorded on a Mercury-Plus spectrometer (400 MHz). Mass spectra (EI-MS) were recorded on a HP 5989B Mass Spectrometer. Elemental analyses were performed on a Perkin-Elmer 240 C analyzer.

#### Phenylphosphinacalix[3]trifuran (1).

In a 100 mL flask, furan (5.0 mL, 69 mmol) was dissolved in THF (40 mL) under an argon atmosphere. The mixture was cooled to  $-78\text{ }^\circ\text{C}$ , and  $^n\text{BuLi}$  (30 mL, 2.5 mol/L solution in hexane, 75 mmol) was added. The solution was stirred for 30 min at  $-78\text{ }^\circ\text{C}$  and then for 2 h at ambient temperature. Then the mixture was cooled to  $-60\text{ }^\circ\text{C}$  and  $\text{PhPCl}_2$  (4.7 mL, 34.5 mmol) was added. The mixture was warmed to room temperature and stirred for additional 2 h. The mixture was cooled to  $-60\text{ }^\circ\text{C}$  and  $^n\text{BuLi}$  (30 mL, 2.5 mol/L solution in hexane, 75 mmol) was added. The solution was stirred for 30 min at  $-78\text{ }^\circ\text{C}$  and then for 4 h at ambient temperature. Then the mixture was cooled to  $-60\text{ }^\circ\text{C}$  and  $\text{PhPCl}_2$  (4.7 mL, 34.5 mmol) was added. The mixture was warmed to room temperature and refluxed for 24 h. The  $\text{LiCl}$  that formed was removed by filtration over a pad of Celite. The resulting filtrate was treated dropwise with water. The organic layer was then separated from the aqueous layer, dried over  $\text{MgSO}_4$ , and filtered. After evaporation of solvent in vacuo, the residue was subject to column chromatography (silica,  $\text{CH}_2\text{Cl}_2/\text{Hexane}$  3:1) to give a white solid (523 mg, 4% yield).  $^1\text{H}$  NMR (400 MHz,  $\text{CDCl}_3$ ):  $\delta$  7.59-7.62 (m, 6H, Ph-H), 7.28-7.30 (m, 3H, Ph-H), 6.15-7.17 (m, 6H, Ph-H), 6.80 (s, 6H, 2-furyl-H) ppm.  $^{13}\text{C}$  NMR (100 MHz,  $\text{CDCl}_3$ ): 156.60, 134.34, 133.52, 133.32, 128.65, 128.08, 128.00, 121.76 ppm.  $^{31}\text{P}\{^1\text{H}\}$  NMR (162 MHz,  $\text{CDCl}_3$ ):  $\delta$  -61.95 (s) ppm. EI-MS (m/z): 522  $[\text{M}]^+$ , Anal. Calcd for  $\text{C}_{30}\text{H}_{21}\text{O}_3\text{P}_3$ : C, 68.97, H, 4.05; found: C, 68.80, H, 4.25.

#### Phenylphosphinacalix[3]trifuran trioxide (2).

In a 50 mL flask, compound **1** (42 mg, 0.08 mmol) was dissolved in  $\text{CH}_2\text{Cl}_2$  (20 mL). The mixture was cooled to  $0\text{ }^\circ\text{C}$ , and  $\text{H}_2\text{O}_2$  (1.0 mL, 30%, 8.8 mmol) was added slowly. The solution was stirred for 24 h at ambient temperature. The organic layer was then separated from the aqueous layer, dried over  $\text{MgSO}_4$ , and filtered. After evaporation of solvent in vacuo, the residue was subject to column chromatography (silica, THF/hexane 3:1) to give a white solid (28 mg, 58% yield).  $^1\text{H}$  NMR (400 MHz,  $\text{CDCl}_3$ ):  $\delta$  7.80-7.85 (m, 6H, Ph-H), 7.60-7.62 (m, 3H, Ph-H), 7.40-7.43 (m, 6H, Ph-H), 7.33 (s, 6H, 2-furyl-H) ppm.  $^{13}\text{C}$  NMR (100 MHz,  $\text{CDCl}_3$ ): 153.18, 133.08, 130.93, 130.82, 128.71, 128.58, 121.71 ppm.  $^{31}\text{P}\{^1\text{H}\}$  NMR (162 MHz,  $\text{CDCl}_3$ ):  $\delta$  2.62 (s) ppm. EI-MS (m/z): 570  $[\text{M}]^+$ , Anal. Calcd for  $\text{C}_{30}\text{H}_{21}\text{O}_6\text{P}_3$ : C, 63.17, H, 3.71; found: C, 62.95, H, 3.78.

### Phenylphosphinacalix[3]trifuran trisulfide (3).

In a 50 mL flask, compound **1** (42 mg, 0.08 mmol) was dissolved in THF (10 mL) under an argon atmosphere. Element sulfur (16 mg, 0.5 mmol) was added. The mixture was refluxed for 24 h. After evaporation of solvent in vacuo, the residue was subject to column chromatography (silica, THF/hexane 5:1) to give a yellow solid (44 mg, 91% yield). <sup>1</sup>H NMR (400 MHz, CDCl<sub>3</sub>): δ 7.89-7.94 (m, 6H, Ph-H), 7.55-7.57 (m, 3H, Ph-H), 7.33-7.38(m, 12H, Ph-H, 2-furyl-H) ppm. <sup>13</sup>C NMR (100 MHz, CDCl<sub>3</sub>): 154.58, 132.39, 131.14, 131.02, 128.60, 122.74, 122.60 ppm. <sup>31</sup>P{<sup>1</sup>H} NMR (162 MHz, CDCl<sub>3</sub>): δ 9.01 (s) ppm. EI-MS (m/z): 618 [M]<sup>+</sup>, Anal. Calcd for C<sub>30</sub>H<sub>21</sub>O<sub>3</sub>P<sub>3</sub>S<sub>3</sub>: C, 58.25, H, 3.42; found: C, 57.98, H, 3.64.

### Phenylphosphinacalix[3]trifuran triselenide (4).

In a 50 mL flask, compound **1** (42 mg, 0.08 mmol) was dissolved in CHCl<sub>3</sub> (10 mL) under an argon atmosphere. Element selenium (39.5 mg, 0.5 mmol) was added. The mixture was refluxed for 24 h. After evaporation of solvent in vacuo, the residue was subject to column chromatography (silica, THF/hexane 5:1) to give a red solid (55 mg, 92% yield). <sup>1</sup>H NMR (400 MHz, CDCl<sub>3</sub>): δ 7.82-7.91 (m, 6H, Ph-H), 7.55-7.60 (m, 3H, Ph-H), 7.33-7.53(m, 12H, Ph-H, 2-furyl-H) ppm. <sup>13</sup>C NMR (100 MHz, CDCl<sub>3</sub>): 153.52, 132.04, 131.34, 131.21, 131.13, 128.38, 128.25, 123.56 ppm. <sup>31</sup>P{<sup>1</sup>H} NMR (162 MHz, CDCl<sub>3</sub>): δ -5.17 (s, <sup>1</sup>J<sub>P-Se</sub> = 821 Hz) ppm. EI-MS (m/z): 762 [M]<sup>+</sup>, Anal. Calcd for C<sub>30</sub>H<sub>21</sub>O<sub>3</sub>P<sub>3</sub>Se<sub>3</sub>: C, 47.46, H, 2.79; found: C, 47.40, H, 2.88.

### 2, 4-bis(2-furylphenylphosphino)furan C.

In a 100 mL flask, furan (5.0 mL, 69 mmol) was dissolved in THF (40 mL) under an argon atmosphere. The mixture was cooled to -78 °C, and <sup>n</sup>BuLi (30 mL, 2.5 mol/L solution in hexane, 75 mmol) was added. The solution was stirred for 30 min at -78 °C and then for 2 h at ambient temperature. Then the mixture was cooled to -60 °C and PhPCl<sub>2</sub> (4.7 mL, 34.5 mmol) was added. The mixture was warmed to room temperature and stirred for additional 2 h. The mixture was cooled to -60 °C and <sup>n</sup>BuLi (30 mL, 2.5 mol/L solution in hexane, 75 mmol) was added. The solution was stirred for 30 min at -78 °C and then for 4 h at ambient temperature. The LiCl that formed was removed by filtration over a pad of Celite. The resulting filtrate was treated dropwise with water. The organic layer was then separated from the aqueous layer, dried over MgSO<sub>4</sub>, and filtered. After evaporation of solvent in vacuo, the residue was subject to column chromatography (silica, CH<sub>2</sub>Cl<sub>2</sub>/Hexane 3:1) to give a white solid (1531 mg, 16% yield). <sup>1</sup>H NMR (400 MHz, CDCl<sub>3</sub>): δ 7.61 (br, 2H, furyl-H), 7.40-7.43 (m, 4H, Ph-H), 7.24-7.30 (m, 6H, Ph-H), 6.65-6.72 (m, 4H, furyl-H), 6.37-6.39 (m, 2H, furyl-H) ppm. <sup>13</sup>C NMR (100 MHz, CDCl<sub>3</sub>): 156.08, 155.95, 150.27, 147.30, 134.46, 134.38, 132.86, 132.66, 128.90, 128.34, 128.26, 121.91, 121.66, 121.52, 121.42, 121.30, 121.21, 110.70, 110.66 ppm. <sup>31</sup>P{<sup>1</sup>H} NMR (162 MHz, CDCl<sub>3</sub>): δ -53.05 (s) ppm. EI-MS (m/z): 416 [M]<sup>+</sup>, Anal. Calcd for C<sub>24</sub>H<sub>18</sub>O<sub>3</sub>P<sub>2</sub>: C, 69.24, H, 4.36; found: C, 69.20, H, 4.32.

### **[PdCl<sub>2</sub>]{Phenylphosphinacalix[3]trifuran}<sub>2</sub> (5)**

In a 50 mL flask, Phenylphosphinacalix[3]trifuran (1) (26 mg, 0.05 mmol) was dissolved in CH<sub>2</sub>Cl<sub>2</sub> (15 mL) under an argon atmosphere. A solution of PdCl<sub>2</sub>(CH<sub>3</sub>CN)<sub>2</sub> (13 mg, 0.05 mmol) in CH<sub>2</sub>Cl<sub>2</sub> (6 mL) was added slowly. After addition, the reaction mixture was stirred for 2 h at room temperature to give a green solution. The solution was carefully layered with 3 mL of methanol. After the mixture stood for 1 day, a red precipitate formed, which was filtered, washed with methanol, and dried in vacuo, a 28 mg amount (80%) of **5** as a red crystal was obtained. <sup>1</sup>H NMR (400 MHz, DMSO-*d*<sub>6</sub>): δ 8.17 (br, 4H), 7.75 (br, 4H), 7.51-7.38 (m, 30H), 6.48 (br, 4H) ppm. <sup>31</sup>P{<sup>1</sup>H} NMR (162 MHz, DMSO-*d*<sub>6</sub>): δ -5.19 (s, 4P), -53.46 (s, 2P) ppm. Anal. Calcd for C<sub>60</sub>H<sub>42</sub>Cl<sub>4</sub>O<sub>6</sub>P<sub>6</sub>Pd<sub>2</sub>: C, 51.49, H, 3.02; found: C, 51.42, H, 3.20.

### **General Procedures for Reaction Condition Screenings.**

Pd source (0.05 mmol), phosphine ligand **1** (0.05 mmol) and phase transfer reagent (10 mmol) were dissolved in water (10 mL). The resulting solution was stirred at room temperature for 5 minutes before immediate use. The aqueous solution of the catalyst (1.0 mL) containing Pd source (0.005 mmol), phosphine ligand **1** (0.005 mmol) and phase transfer reagent (1.0 mmol) was loaded into a Schlenk tube equipped with a Teflon-coated magnetic stir bar. Bromobenzene (112 mg, 1.0 mmol), 4-methoxyphenylboronic acid (182 mg, 1.2 mmol), base (3.0 mmol) and water (1.0 mL) were added. The tube was evacuated and flushed with nitrogen for three times, placed into a preheated oil bath (100 °C) and stirred for 8 h. After completion of reaction, the reaction tube was allowed to cool to room temperature. Ethyl acetate (10 mL) and dodecane (22.6 mg, 0.1 mmol, internal standard) were added. The organic layer was subjected to GC analysis. The GC yield obtained was previously calibrated by authentic sample/dodecane calibration curve. The product was purified by column chromatography (hexane/ethyl acetate as eluent).

### **General Procedure for Suzuki-Miyaura Cross-Coupling Reaction in Water.**

Pd(OAc)<sub>2</sub> (11 mg, 0.05 mmol) and ligand **1** (0.05 mmol) were dissolved in water

(10 mL). The resulting solution was stirred at room temperature for 5 minutes before immediate use. The aqueous solution of the catalyst (1.0 mL) containing Pd(OAc)<sub>2</sub> (1.1 mg, 0.005 mmol) and ligand **1** (6.5 mg, 0.005 mmol) was loaded into a Schlenk tube equipped with a Teflon-coated magnetic stir bar. Aryl halide (1.0 mmol), arylboronic acid (1.2 mmol), base (3.0 mmol) and water (1.0 mL) were added. The tube was evacuated and flushed with nitrogen for three times, and then placed into a preheated oil bath (100 °C) for 8 h. After completion of reaction, the reaction tube was allowed to cool to room temperature, water was drawn with a dropper and the reaction mixture was adsorbed onto silica gel, and then purified by column chromatography (hexane/ethyl acetate as eluent) to afford the desired product.

### Crystallographic Studies

Crystals of **2-4** for X-ray diffraction were obtained by recrystallization of the pure product from CHCl<sub>3</sub>/hexane layers, crystals of **5** were obtained by recrystallization of the pure product from CHCl<sub>3</sub>/methanol layers. Crystallographic data was collected on a Bruker SMART CCD area-detector diffractometer with graphite-monochromated Mo K $\alpha$  radiation ( $\lambda = 0.71073 \text{ \AA}$ ). Diffraction measurements were made at room temperature. An absorption correction by SADABS was applied to the intensity data. The structures were solved by Patterson method. The remaining non-hydrogen atoms were determined from the successive difference Fourier syntheses. All non-hydrogen atoms were refined anisotropically except those mentioned otherwise. The hydrogen atoms were generated geometrically and refined with isotropic thermal parameters. The structures were refined on  $F^2$  by full-matrix least-squares methods using the SHELXTL-97 program package. The crystal data and structural refinements details are listed in Table S1.

**Table S1** Crystal data and structure refinement for **2-5**

|                                               | <b>2</b>                                                          | <b>3</b>                                                                                        | <b>4</b>                                                                                                | <b>5</b>                                                                                         |
|-----------------------------------------------|-------------------------------------------------------------------|-------------------------------------------------------------------------------------------------|---------------------------------------------------------------------------------------------------------|--------------------------------------------------------------------------------------------------|
| Empirical formula                             | C <sub>15</sub> H <sub>10.5</sub> O <sub>3</sub> P <sub>1.5</sub> | C <sub>31</sub> H <sub>22</sub> Cl <sub>3</sub><br>O <sub>3</sub> P <sub>3</sub> S <sub>3</sub> | C <sub>60.5</sub> H <sub>42.5</sub> Cl <sub>11.5</sub><br>O <sub>6</sub> P <sub>6</sub> Se <sub>6</sub> | C <sub>62</sub> H <sub>44</sub> Cl <sub>10</sub> O <sub>6</sub> P <sub>6</sub><br>d <sub>2</sub> |
| Formula weight                                | 285.19                                                            | 737.93                                                                                          | 1578.2                                                                                                  | 1638.09                                                                                          |
| Temperature (K)                               | 200(2)                                                            | 200(2)                                                                                          | 200(2)                                                                                                  | 298(2)                                                                                           |
| Crystal system                                | Triclinic                                                         | Orthorhombic                                                                                    | Triclinic                                                                                               | Monoclinic                                                                                       |
| Space group                                   | P-1                                                               | Pnma                                                                                            | P-1                                                                                                     | P2(1)/m                                                                                          |
| a (Å)                                         | 8.664(3)                                                          | 11.0433(12)                                                                                     | 11.165(2)                                                                                               | 9.319(2)                                                                                         |
| b (Å)                                         | 12.433(5)                                                         | 16.6075(19)                                                                                     | 12.927(3)                                                                                               | 19.982(4)                                                                                        |
| c (Å)                                         | 13.034(5)                                                         | 18.186(2)                                                                                       | 21.775(4)                                                                                               | 18.209(4)                                                                                        |
| α (°)                                         | 90.964(6)                                                         | 90                                                                                              | 83.949(3)                                                                                               | 90                                                                                               |
| β (°)                                         | 90.323(6)                                                         | 90                                                                                              | 84.534(3)                                                                                               | 92.581(4)                                                                                        |
| γ (°)                                         | 106.542(6)                                                        | 90                                                                                              | 77.702(3)                                                                                               | 90                                                                                               |
| Volume (Å <sup>3</sup> )                      | 1345.7(9)                                                         | 3335.3(6)                                                                                       | 3044.9(10)                                                                                              | 3387.4(13)                                                                                       |
| Z, D <sub>calc</sub> (mg m <sup>-3</sup> )    | 4, 1.408                                                          | 4, 1.470                                                                                        | 2, 1.721                                                                                                | 2, 1.606                                                                                         |
| Abs coefficient (mm <sup>-1</sup> )           | 0.265                                                             | 0.639                                                                                           | 3.879                                                                                                   | 1.116                                                                                            |
| F(000)                                        | 588                                                               | 1504                                                                                            | 1546                                                                                                    | 1632                                                                                             |
| Crystal size (mm <sup>3</sup> )               | 0.23×0.20×0.20                                                    | 0.16×0.12×0.10                                                                                  | 0.16×0.15×0.12                                                                                          | 0.12×0.10×0.10                                                                                   |
| θ range (°)                                   | 1.56-25.00                                                        | 2.48-25.02                                                                                      | 1.62-25.00                                                                                              | 1.02- 23.71                                                                                      |
| Reflections collected                         | 8170                                                              | 19984                                                                                           | 20584                                                                                                   | 20365                                                                                            |
| Independent reflections                       | 4637                                                              | 3040                                                                                            | 10542                                                                                                   | 5188                                                                                             |
| Completeness to θ (%)                         | 97.5                                                              | 99.5                                                                                            | 98.3                                                                                                    | 97.6                                                                                             |
| Max. and min. transmission                    | 0.9489, 0.9416                                                    | 0.9389, 0.9047                                                                                  | 0.6532, 0.5757                                                                                          | 0.8966, 0.8778                                                                                   |
| Data/restraints/parameters                    | 4637/0/354                                                        | 3040/6/220                                                                                      | 10542/30/733                                                                                            | 5188/1/383                                                                                       |
| Goodness-of-fit on F <sup>2</sup>             | 1.062                                                             | 1.108                                                                                           | 1.075                                                                                                   | 1.113                                                                                            |
| R <sub>1</sub> and wR <sub>2</sub> [I>2σ(I)]  | 0.0672, 0.2008                                                    | 0.0657, 0.2091                                                                                  | 0.0810, 0.2066                                                                                          | 0.1030, 0.2645                                                                                   |
| R <sub>1</sub> and wR <sub>2</sub> (all data) | 0.0909, 0.2280                                                    | 0.0825, 0.2237                                                                                  | 0.1081, 0.2184                                                                                          | 0.1176, 0.2747                                                                                   |

**Table S2** Optimization of the reaction conditions<sup>a</sup>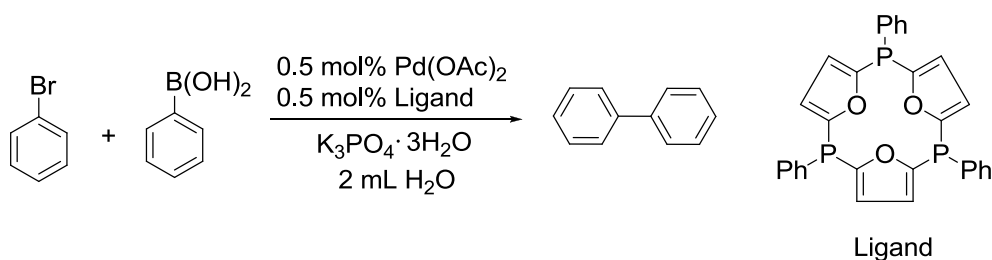

| Entry | Pd source                                                                                | Phase Transfer Reagent                                | Temperature ( °C ) | Yield (%) <sup>b</sup> |
|-------|------------------------------------------------------------------------------------------|-------------------------------------------------------|--------------------|------------------------|
| 1     | Pd(OAc) <sub>2</sub>                                                                     | -                                                     | 100                | 98                     |
| 2     | Pd(OAc) <sub>2</sub>                                                                     | TBAB                                                  | 100                | 89                     |
| 3     | Pd(OAc) <sub>2</sub>                                                                     | Me(octyl) <sub>3</sub> N <sup>+</sup> Cl <sup>-</sup> | 100                | 97                     |
| 4     | PdCl <sub>2</sub> (CN) <sub>2</sub>                                                      | -                                                     | 100                | 18                     |
| 5     | PdCl <sub>2</sub>                                                                        | -                                                     | 100                | 53                     |
| 6     | ( $\eta^3$ -C <sub>3</sub> H <sub>5</sub> ) <sub>2</sub> Pd <sub>2</sub> Cl <sub>2</sub> | -                                                     | 100                | 56                     |
| 7     | <b>5</b>                                                                                 | -                                                     | 100                | 89                     |
| 8     | Pd(OAc) <sub>2</sub>                                                                     | -                                                     | 25                 | 5                      |
| 9     | Pd(OAc) <sub>2</sub>                                                                     | -                                                     | 60                 | 58                     |
| 10    | Pd(OAc) <sub>2</sub>                                                                     | -                                                     | 80                 | 74                     |

<sup>a</sup>Reaction conditions: 1.0 mmol of bromobenzene, 1.2 mmol of phenylboronic acid, 1.0 mmol phase transfer reagent, 0.5 mol% Pd(OAc)<sub>2</sub>, 0.5 mol% ligand, 3.0 mmol of K<sub>3</sub>PO<sub>4</sub>·3H<sub>2</sub>O, 2.0 mL H<sub>2</sub>O, reaction time 8 h. <sup>b</sup>GC yield.

**Table S3** Suzuki-Miyaura coupling reaction using ultra-low loading of catalyst<sup>a</sup>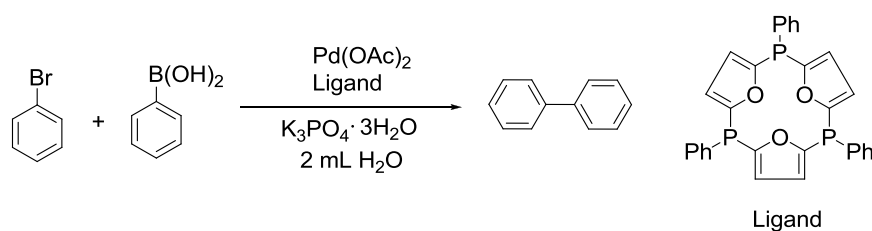

| Entry | Time (h) | Yield (%) <sup>b</sup> | TON        |
|-------|----------|------------------------|------------|
| 1     | 16       | 9                      | 4 500 000  |
| 2     | 24       | 16                     | 8 000 000  |
| 3     | 48       | 28                     | 14 000 000 |
| 4     | 72       | 61                     | 30 500 000 |

<sup>a</sup>Reaction conditions: 1.0 mmol of bromobenzene, 1.2 mmol of phenylboronic acid,  $2 \times 10^{-8}$  mmol Pd(OAc)<sub>2</sub>,  $1.33 \times 10^{-8}$  mmol ligand, 3.0 mmol of K<sub>3</sub>PO<sub>4</sub>·3H<sub>2</sub>O, 2.0 mL H<sub>2</sub>O.

<sup>b</sup>GC yield.

**Table S4** Suzuki-Miyaura coupling reaction using ultra-low loading of catalyst<sup>a</sup>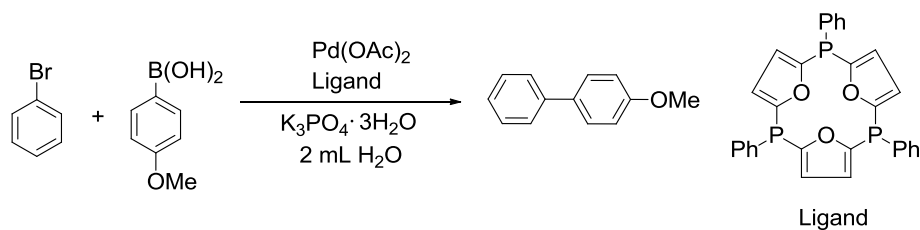

| Entry | Time (h) | Yield (%) <sup>b</sup> | TON        |
|-------|----------|------------------------|------------|
| 1     | 16       | 5                      | 2 500 000  |
| 2     | 24       | 9                      | 4 500 000  |
| 3     | 48       | 17                     | 8 500 000  |
| 4     | 72       | 51                     | 25 500 000 |

<sup>a</sup>Reaction conditions: 1.0 mmol of bromobenzene, 1.2 mmol of 2-methoxy phenylboronic acid,  $2 \times 10^{-8}$  mmol Pd(OAc)<sub>2</sub>,  $1.33 \times 10^{-8}$  mmol ligand, 3.0 mmol of K<sub>3</sub>PO<sub>4</sub>·3H<sub>2</sub>O, 2.0 mL H<sub>2</sub>O. <sup>b</sup>GC yield.

**Table S5** Suzuki-Miyaura coupling reaction using ultra-low loading of catalyst<sup>a</sup>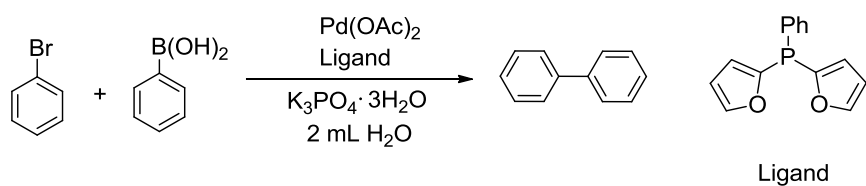

| Entry | Time (h) | Yield (%) <sup>b</sup> | TON        |
|-------|----------|------------------------|------------|
| 1     | 16       | 15                     | 7 500 000  |
| 2     | 24       | 20                     | 10 000 000 |
| 3     | 48       | 26                     | 13 000 000 |
| 4     | 72       | 30                     | 15 000 000 |

<sup>a</sup>Reaction conditions: 1.0 mmol of bromobenzene, 1.2 mmol of phenylboronic acid,  $2 \times 10^{-8}$  mmol Pd(OAc)<sub>2</sub>,  $4 \times 10^{-8}$  mmol ligand, 3.0 mmol of K<sub>3</sub>PO<sub>4</sub>·3H<sub>2</sub>O, 2.0 mL H<sub>2</sub>O. <sup>b</sup>GC yield.



**Table S6** Suzuki-Miyaura coupling reaction using ultra-low loading of catalyst<sup>a</sup>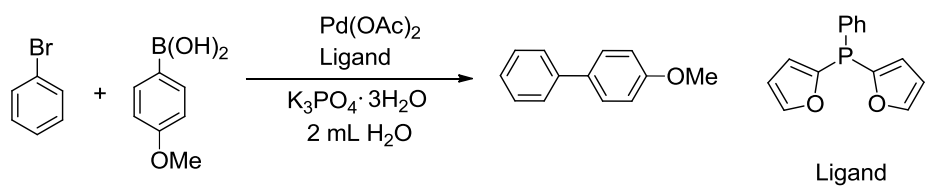

| Entry | Time (h) | Yield (%) <sup>b</sup> | TON        |
|-------|----------|------------------------|------------|
| 1     | 16       | 8                      | 4 000 000  |
| 2     | 24       | 14                     | 7 000 000  |
| 3     | 48       | 21                     | 11 500 000 |
| 4     | 72       | 32                     | 16 000 000 |

<sup>a</sup>Reaction conditions: 1.0 mmol of bromobenzene, 1.2 mmol of phenylboronic acid,  $2 \times 10^{-8}$  mmol Pd(OAc)<sub>2</sub>,  $1.33 \times 10^{-8}$  mmol ligand, 3.0 mmol of K<sub>3</sub>PO<sub>4</sub>·3H<sub>2</sub>O, 2.0 mL H<sub>2</sub>O.

<sup>b</sup>GC yield.

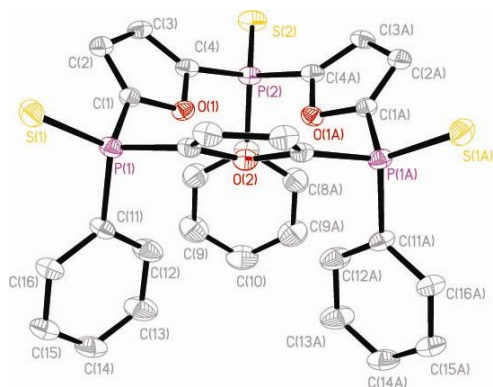

**Figure S1** Molecular structure of **3** with 30% probability level ellipsoids.

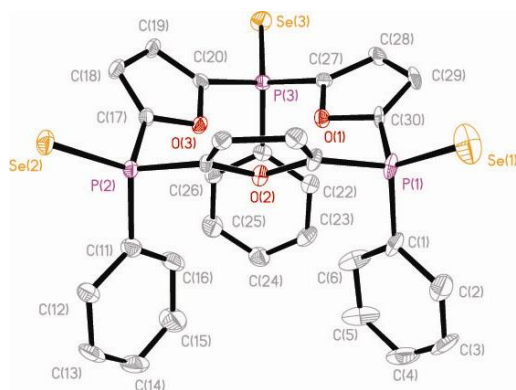

**Figure S2** Molecular structure of **4** with 30% probability level ellipsoids.

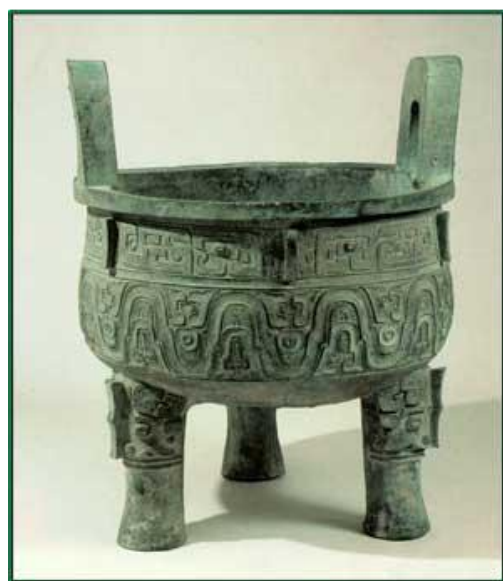

**Figure S3** A Chinese Bronze Tripod. The molecular structures of **2-4** look like an ancient cauldron with three legs

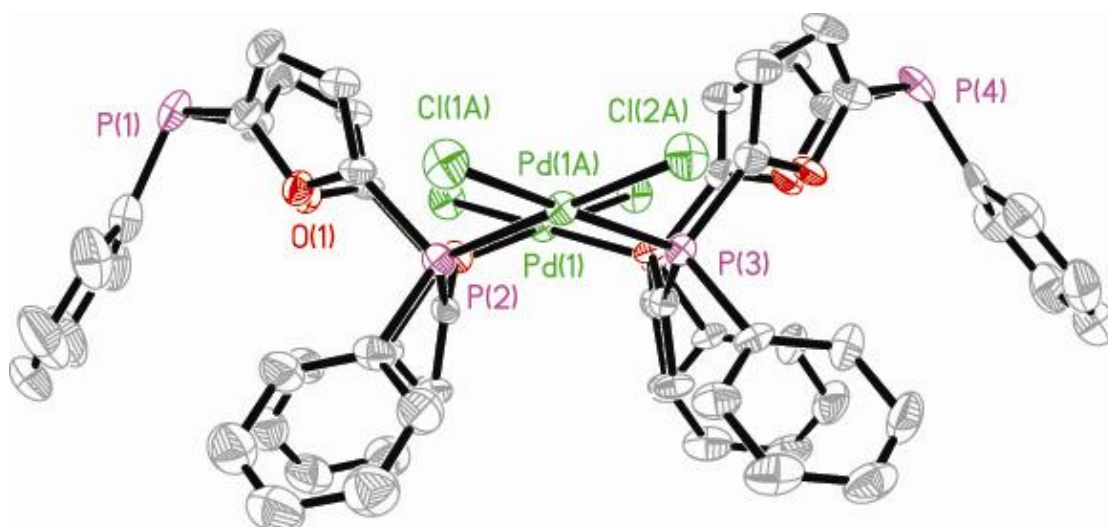

**Figure S4** Molecular structure of **5** with 30% probability level ellipsoids.

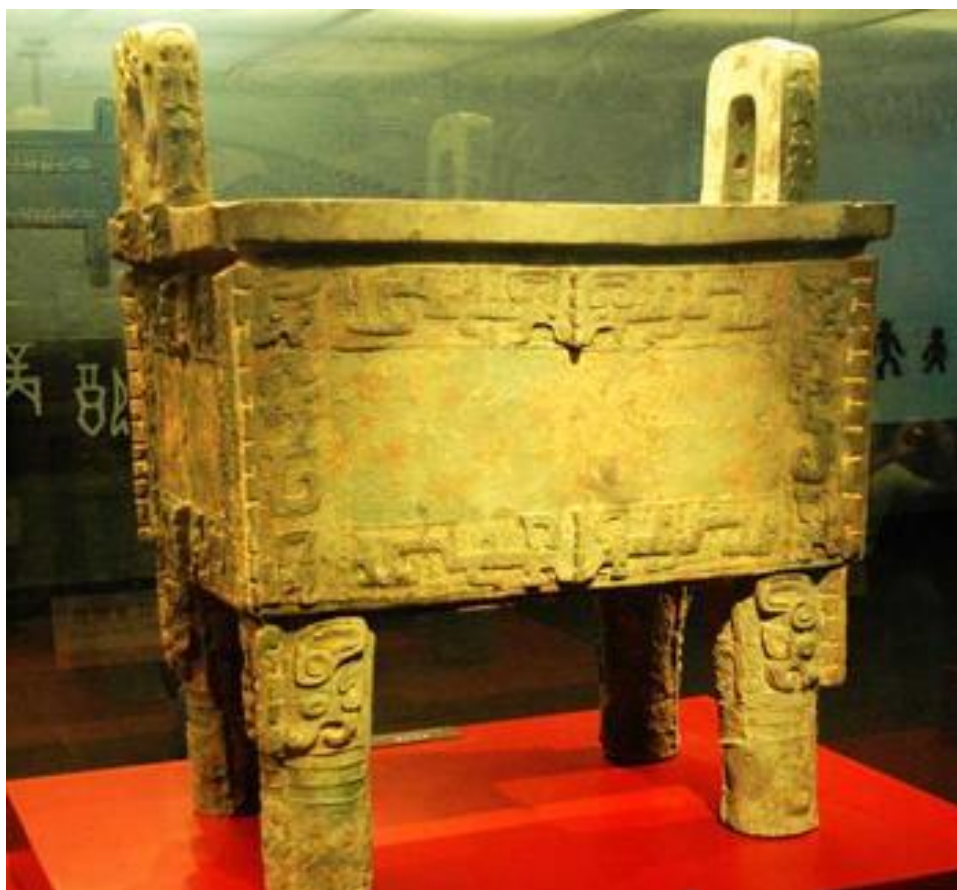

**Figure S5** Si Muwu square vessel (an ancient cauldron with four legs). The molecular structure of **5** looks like an ancient cauldron with four legs

**$^1\text{H}$  NMR,  $^{13}\text{C}$  NMR and  $^{31}\text{P}$  NMR spectra of compounds 1-5 and C**

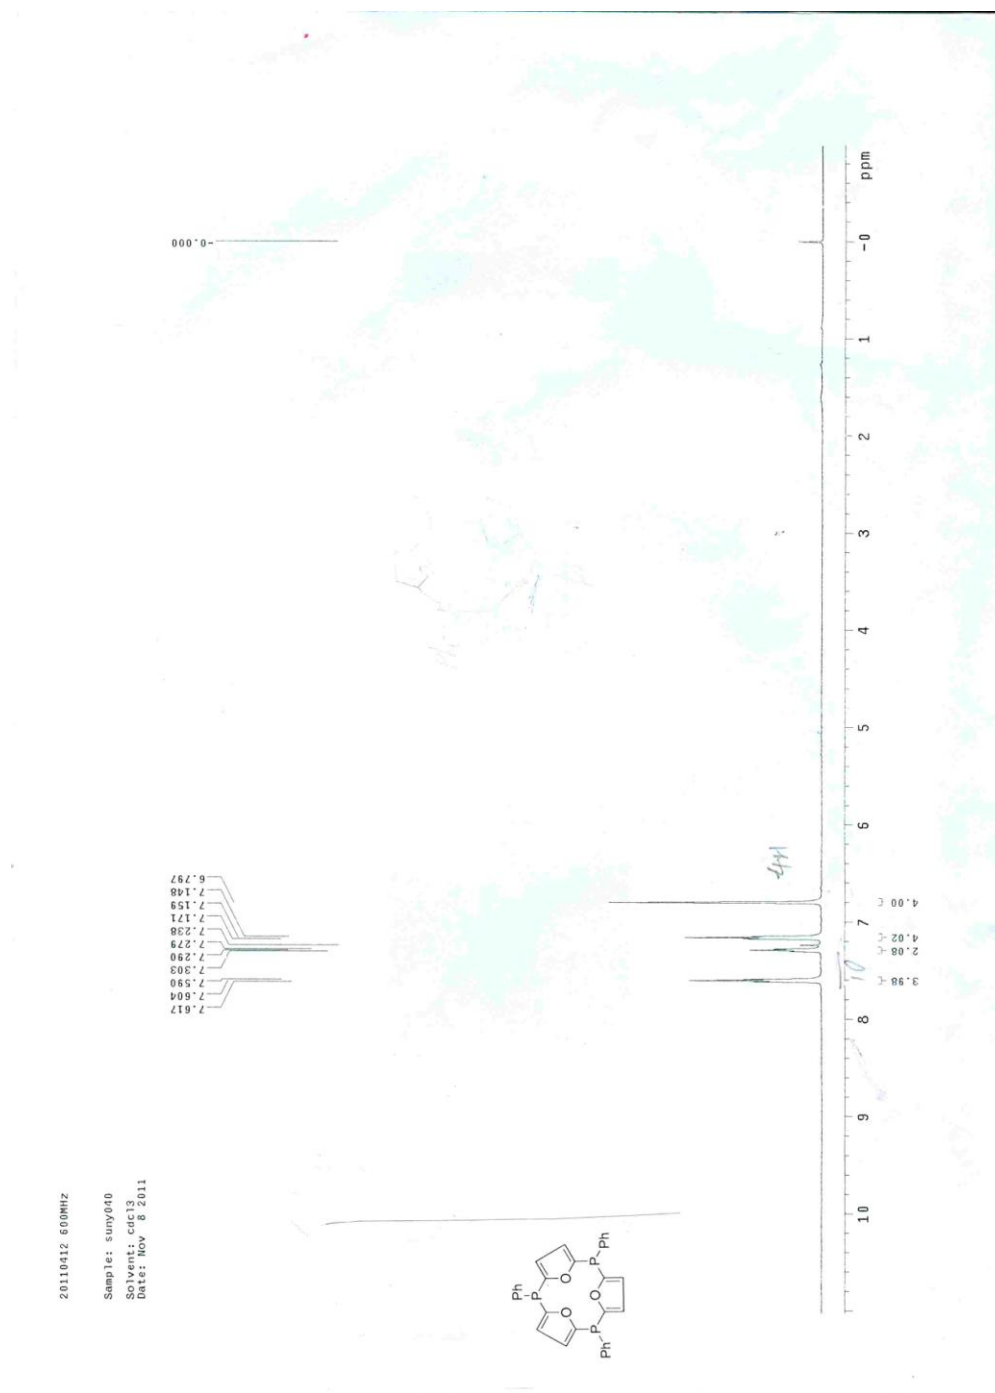

000000 cdc13  
 13  
 20111219

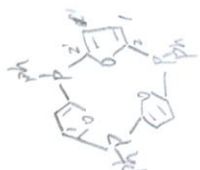

121 ppm — 羰基C  
 156 ppm — 磷C

77.316  
 77.000  
 76.684

121.529  
 121.628  
 121.910  
 122.009  
 127.995  
 128.079  
 128.637  
 133.322  
 133.524  
 134.340

156.444  
 156.703

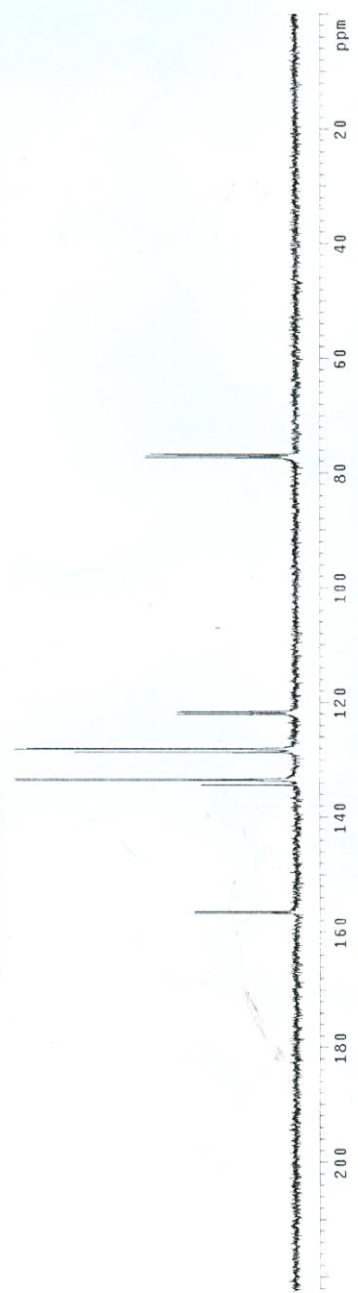

suny040\_p31\_cdcl3  
20111116

Archive directory: /export/home/Liu/vnmrSys/data  
Sample directory:  
File: PHOSPHORUS

Pulse Sequence: s2pu1

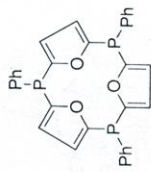

-61.947

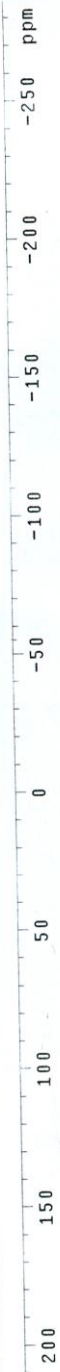

SUNY040 #442 RT: 2.48 AV: 1 NL: 5.01E5  
T: + c Full ms [40.00-600.00]

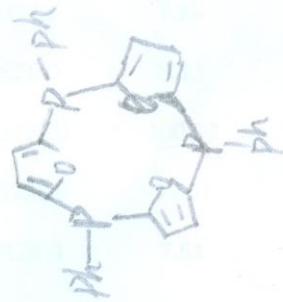

522.07

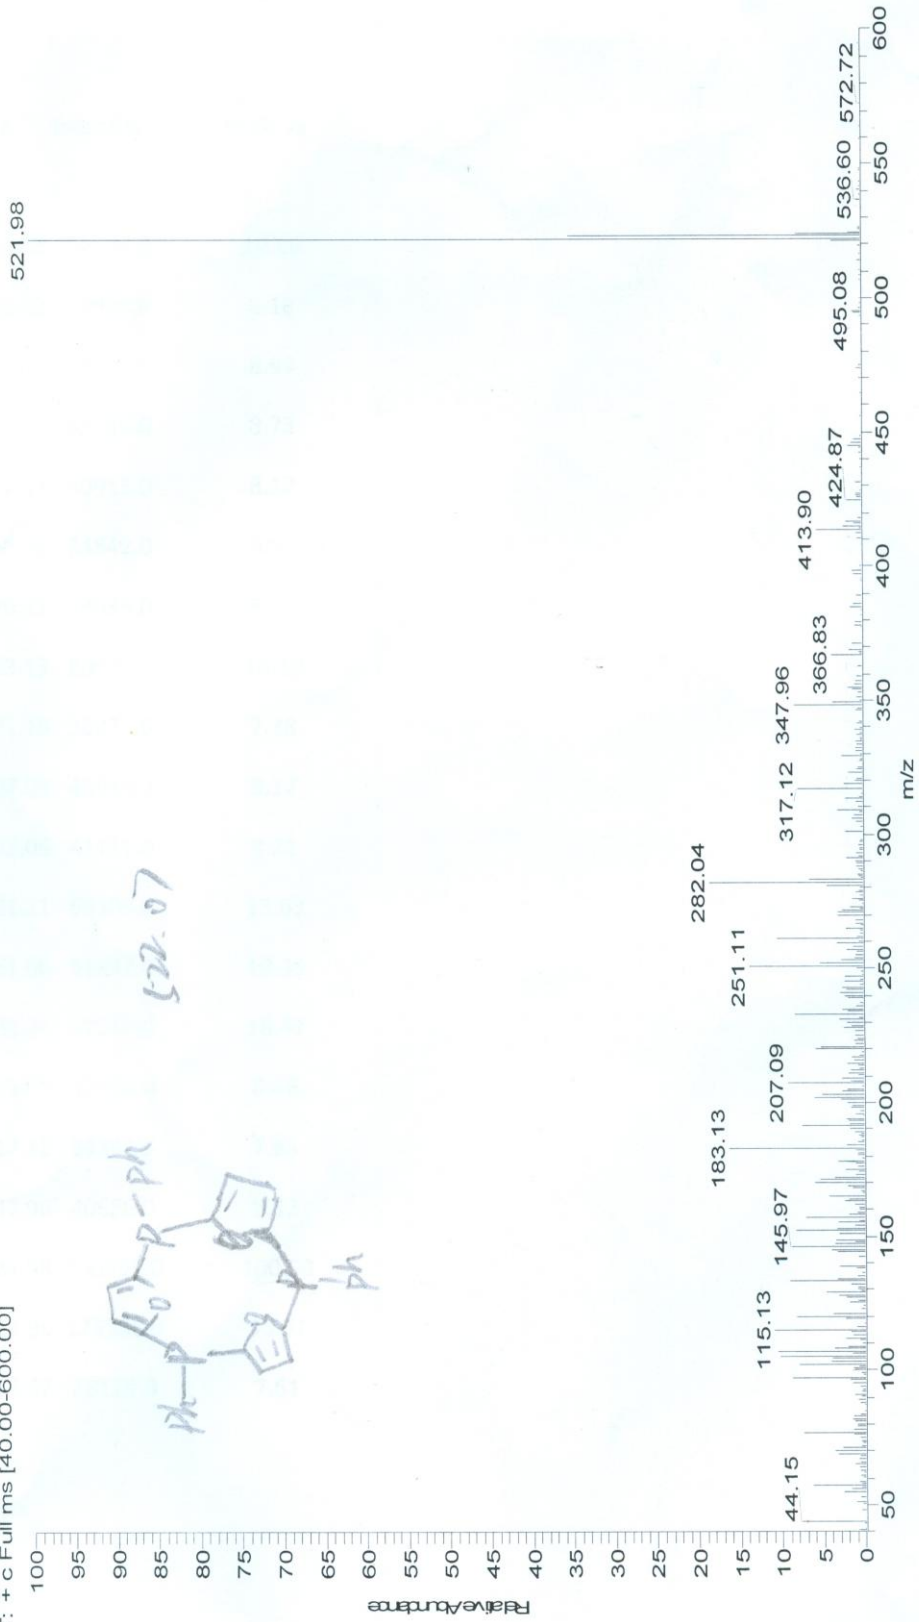





suny010a cdc13  
C13  
20111219

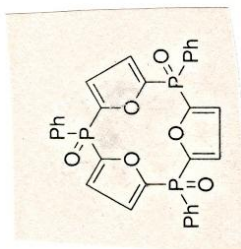

77.278  
76.962  
76.642

152.493  
152.493  
133.076  
130.933  
130.819  
128.715  
128.578  
121.712

153.872  
152.493

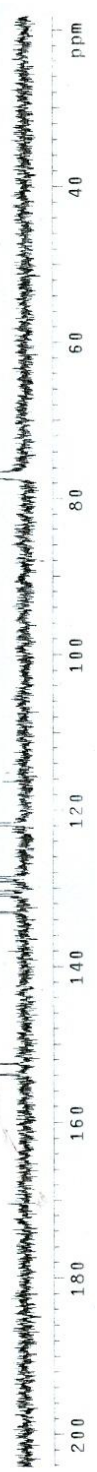



O#537 RT: 4.00 AV: 1 SB: 515 0.04-3.55 , 4.18-4.46 NL: 6.16E4  
T: + c Full ms [40.00-800.00]

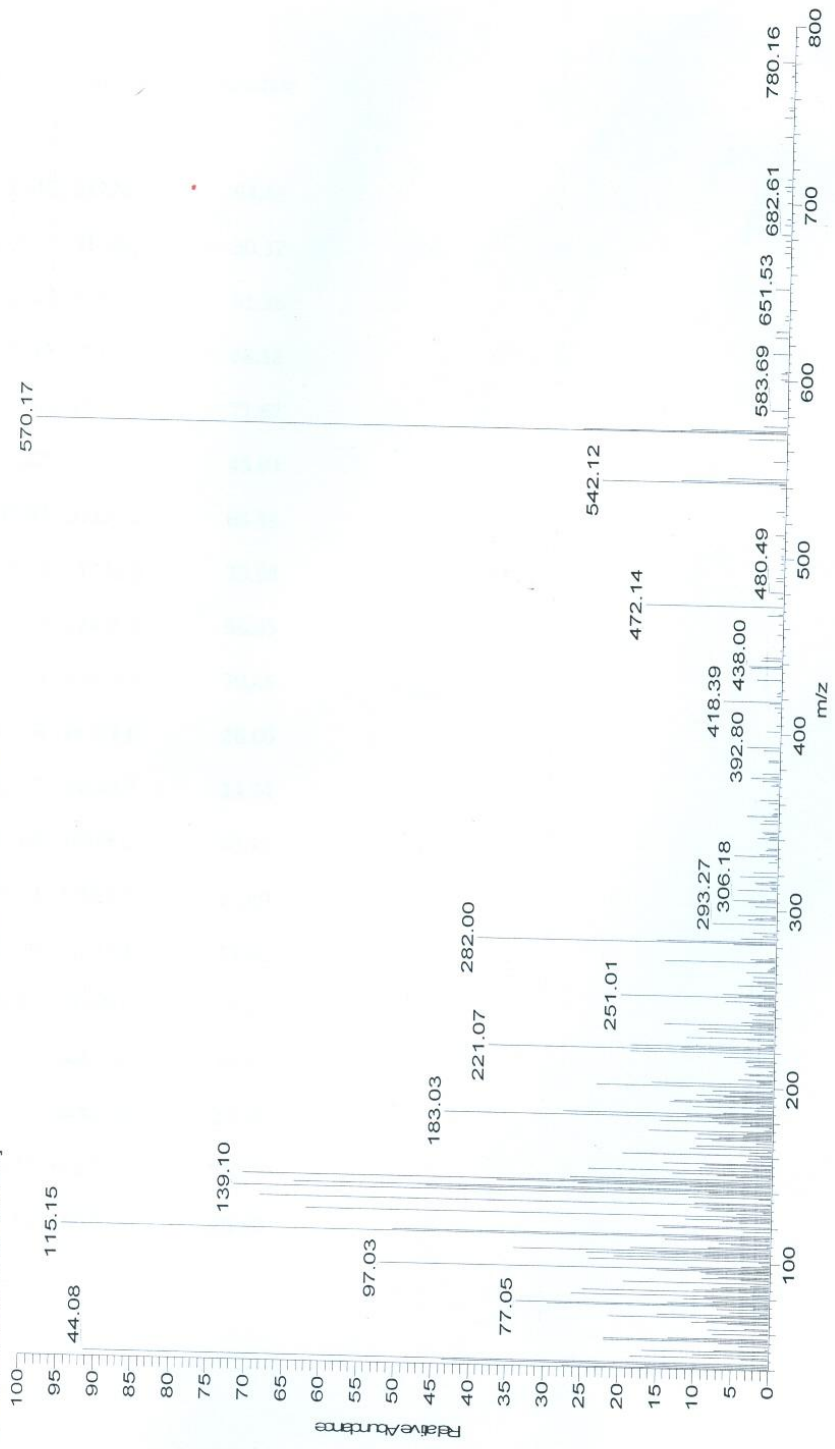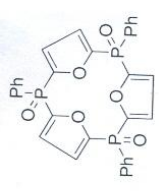

SUNY045 cuc13  
20111122

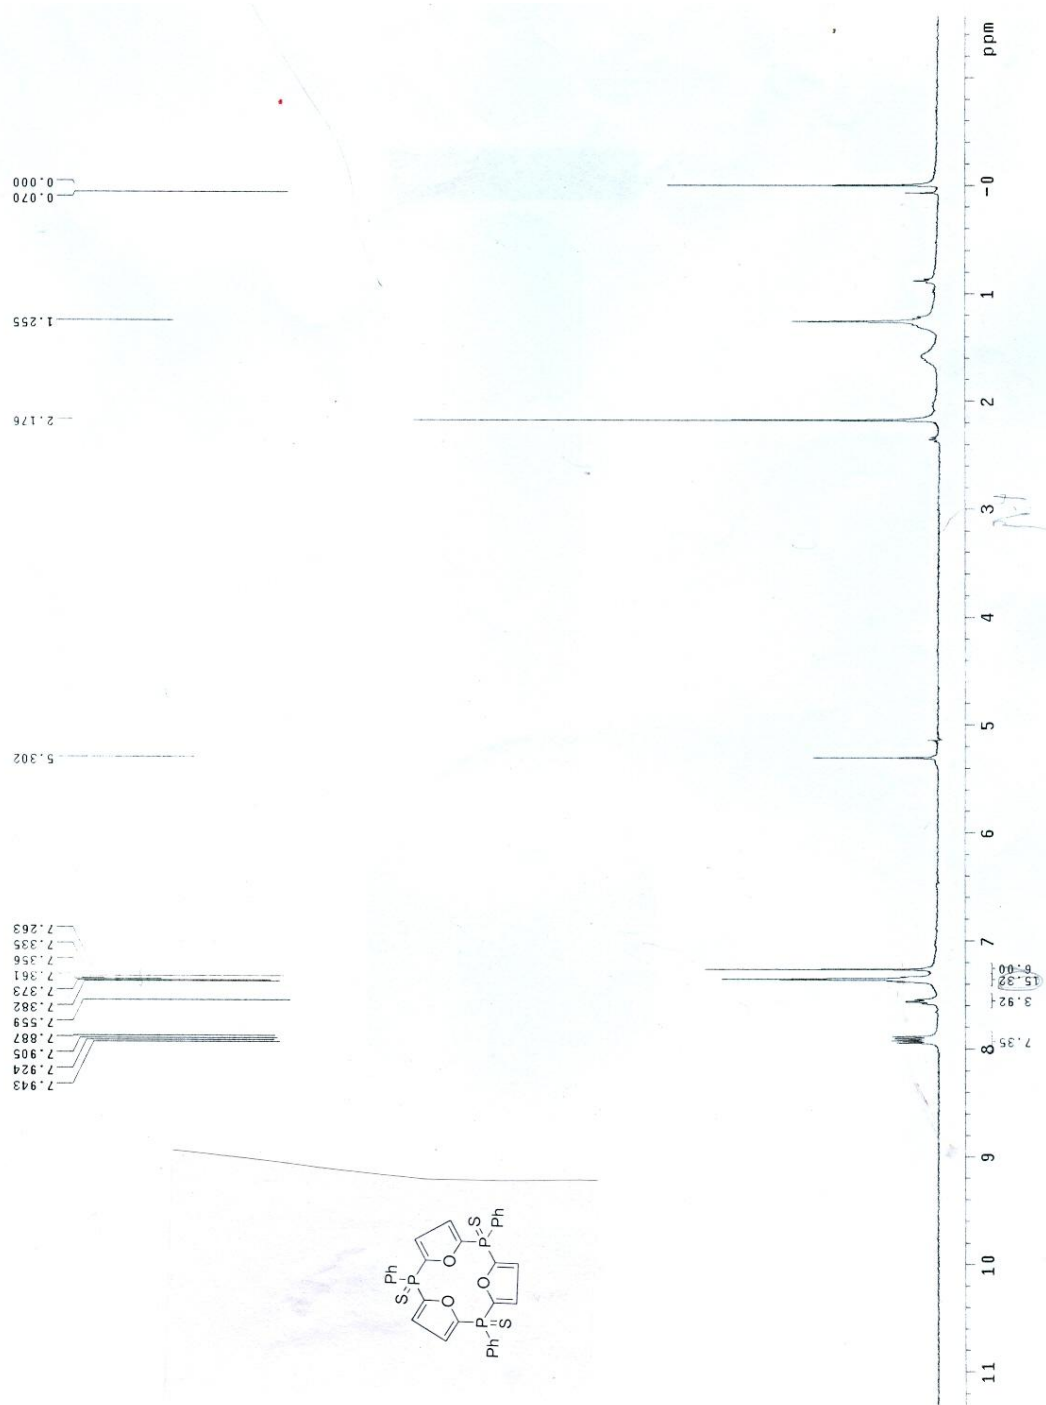

suny040b cdcl3  
c13  
20111220

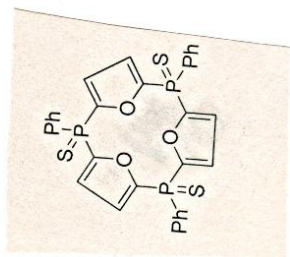

77.320  
77.000  
76.684

132.389  
131.139  
131.021  
130.895  
128.647  
128.510  
122.782  
122.695  
122.569  
122.478

155.141  
154.024  
153.982

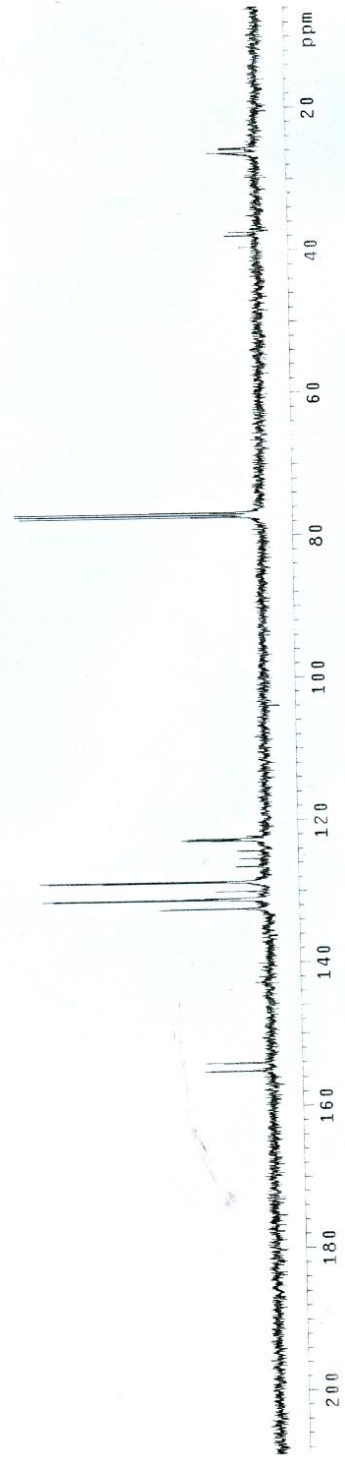

suny045\_cdc13  
20111122

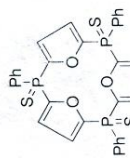

510.6

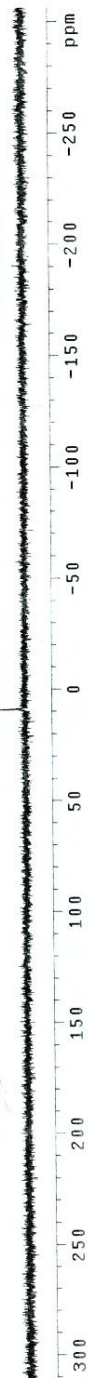

S#437 RT: 3.26 AV: 1 SB: 343 0.73-3.02, 3.47-3.69 NL: 1.46E5  
T: + c Full ms [40.00-800.00]

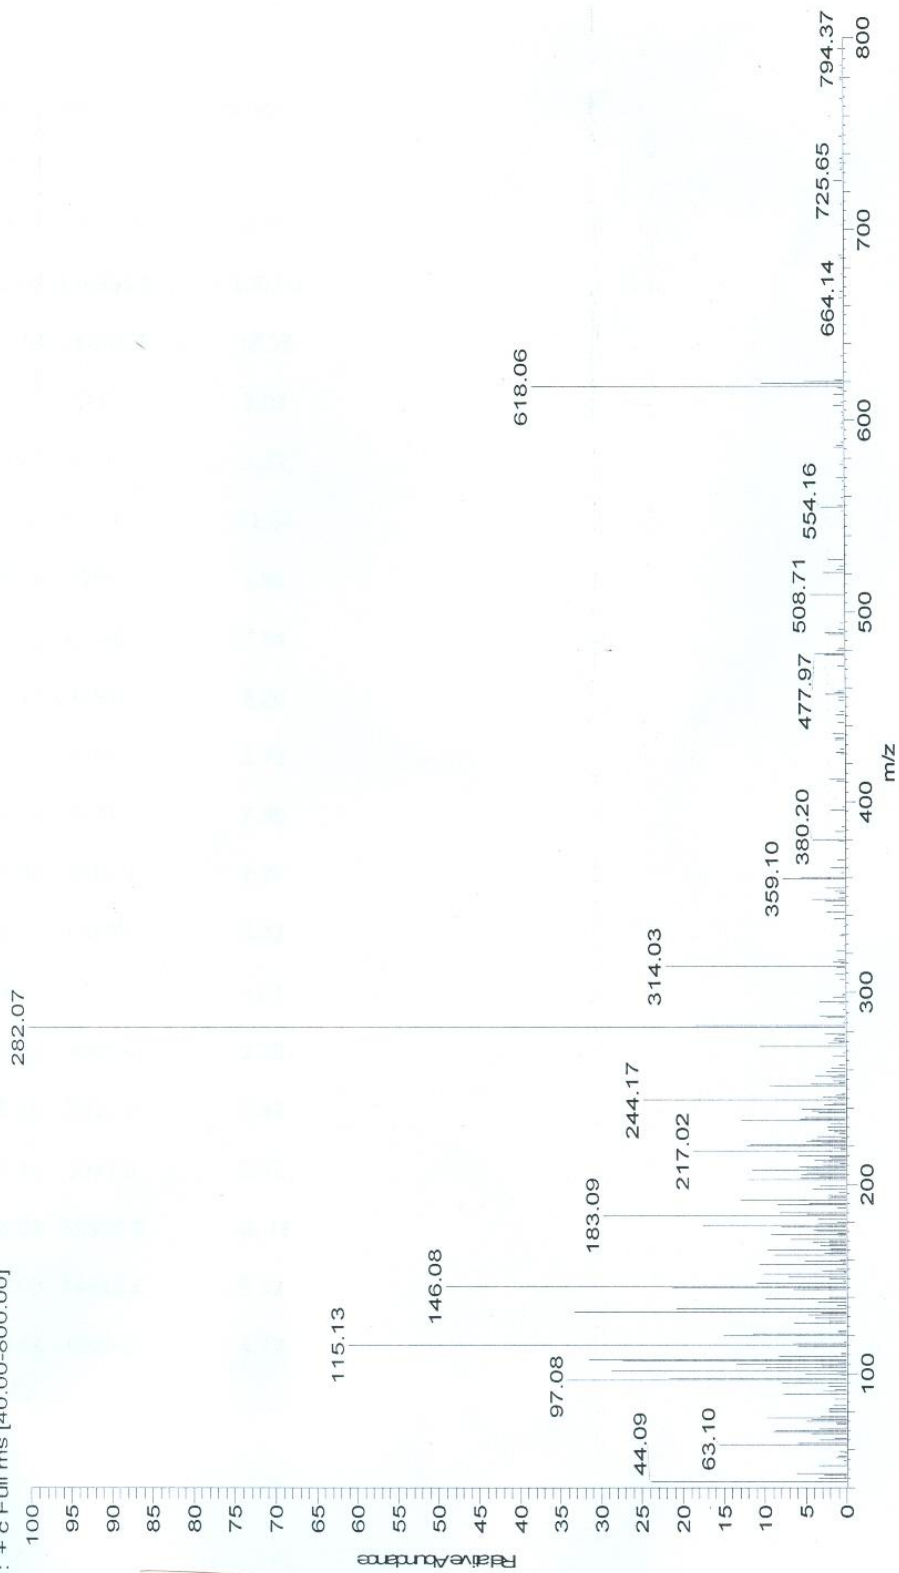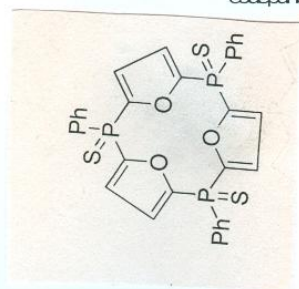

Sony 0106 cdcl3  
20111219

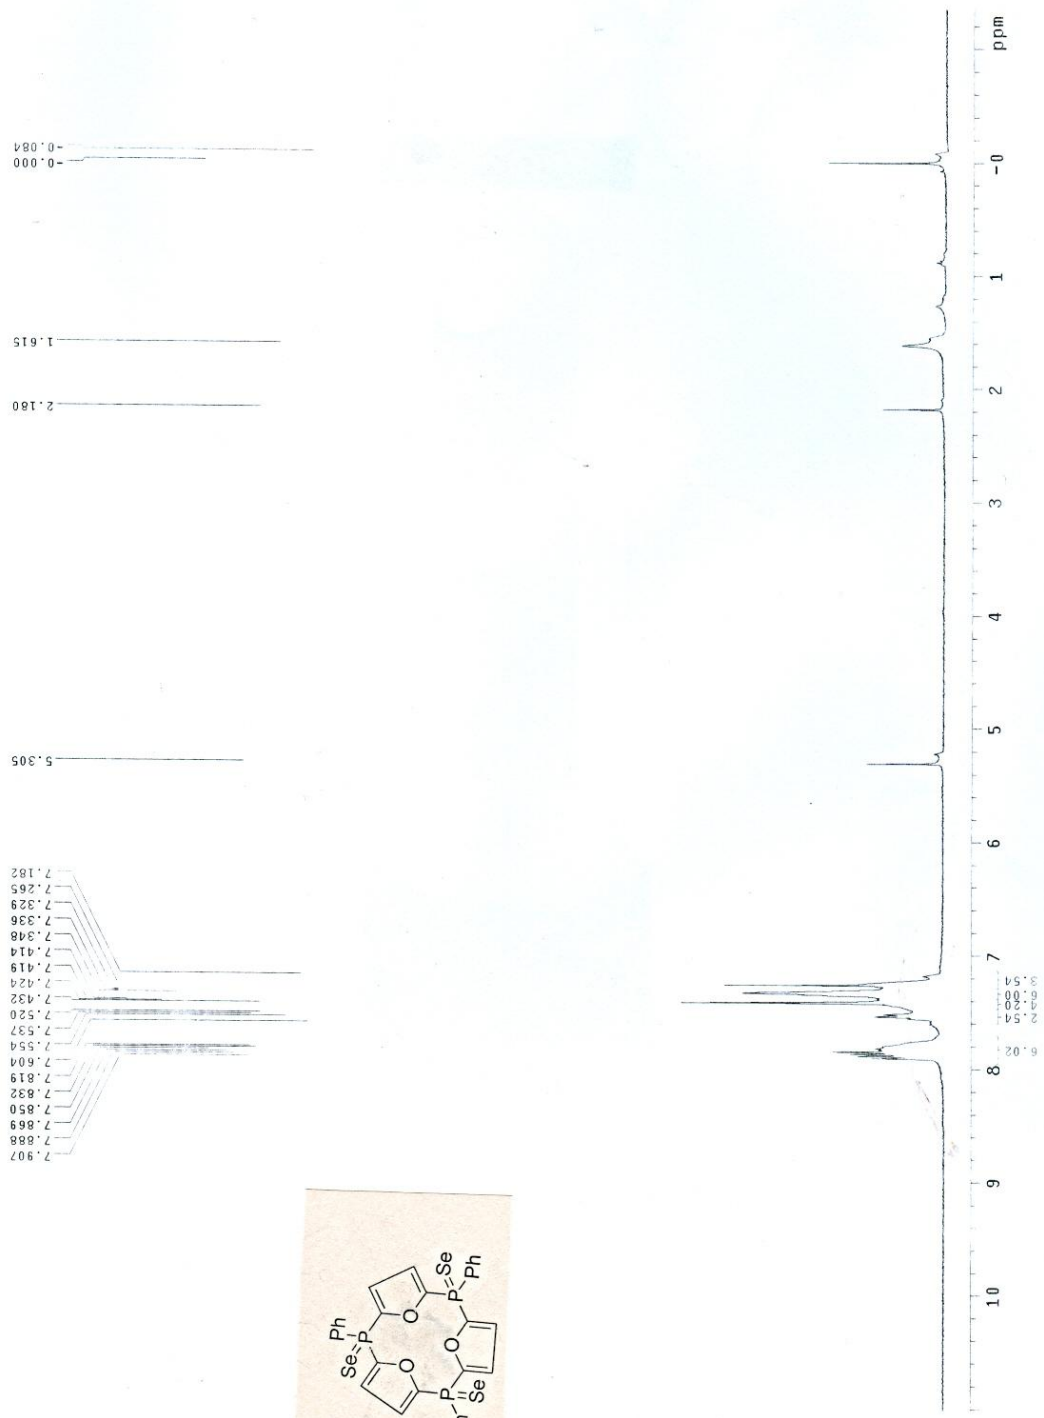





suny belian cc14//20120602

<sup>31</sup>P NMR

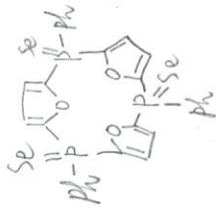

7.706  
5.172  
-2.638

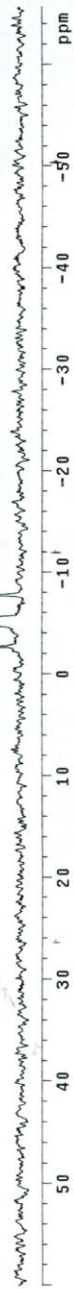

SE #452 RT: 3.40 AV: 1 SB: 429 0.12-2.94 , 3.53-3.87 NL: 2.42E5  
T: + c Full ms [40.00-800.00]

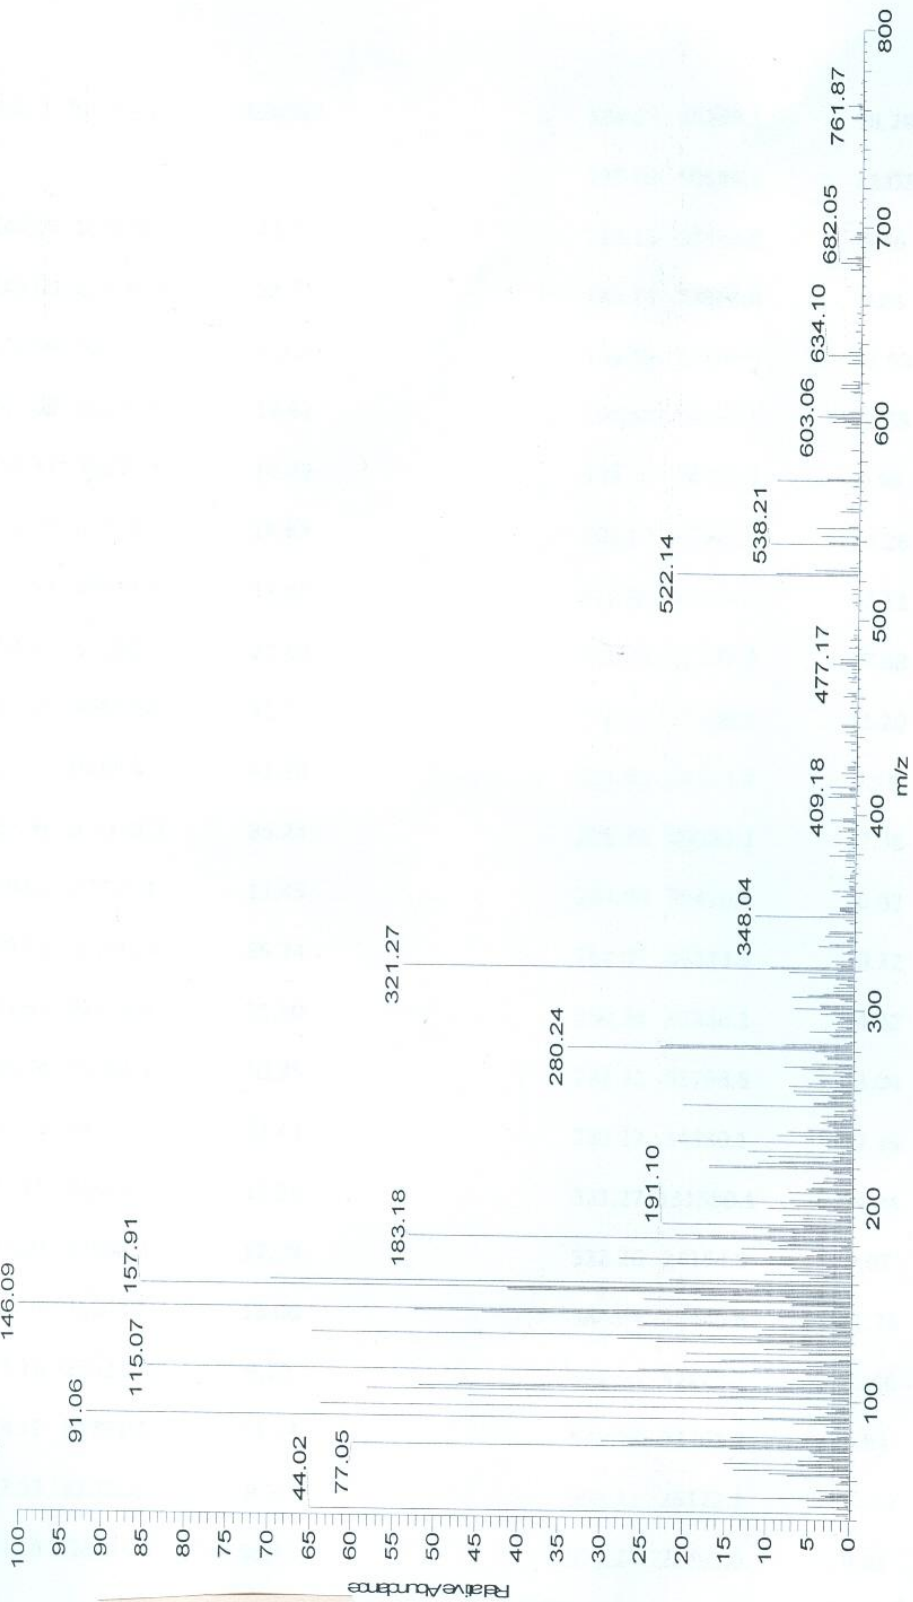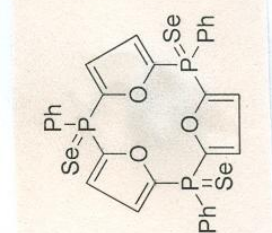

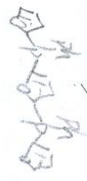

<sup>1</sup>H NMR

SUNY0512a cd13  
20120420

- 7.617
- 7.607
- 7.432
- 7.417
- 7.399
- 7.297
- 7.286
- 7.268
- 7.236
- 6.715
- 6.651
- 6.392
- 6.376
- 6.373

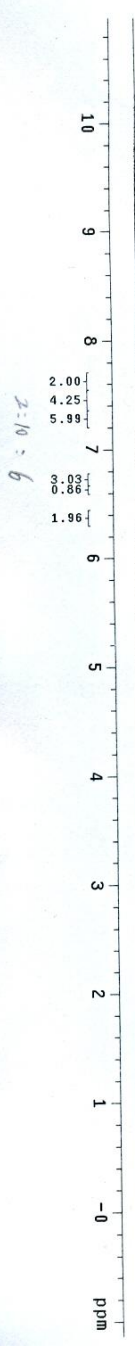

0.000

20120528-sury0638-c13  
sury0638 c13.cdc13  
20120528

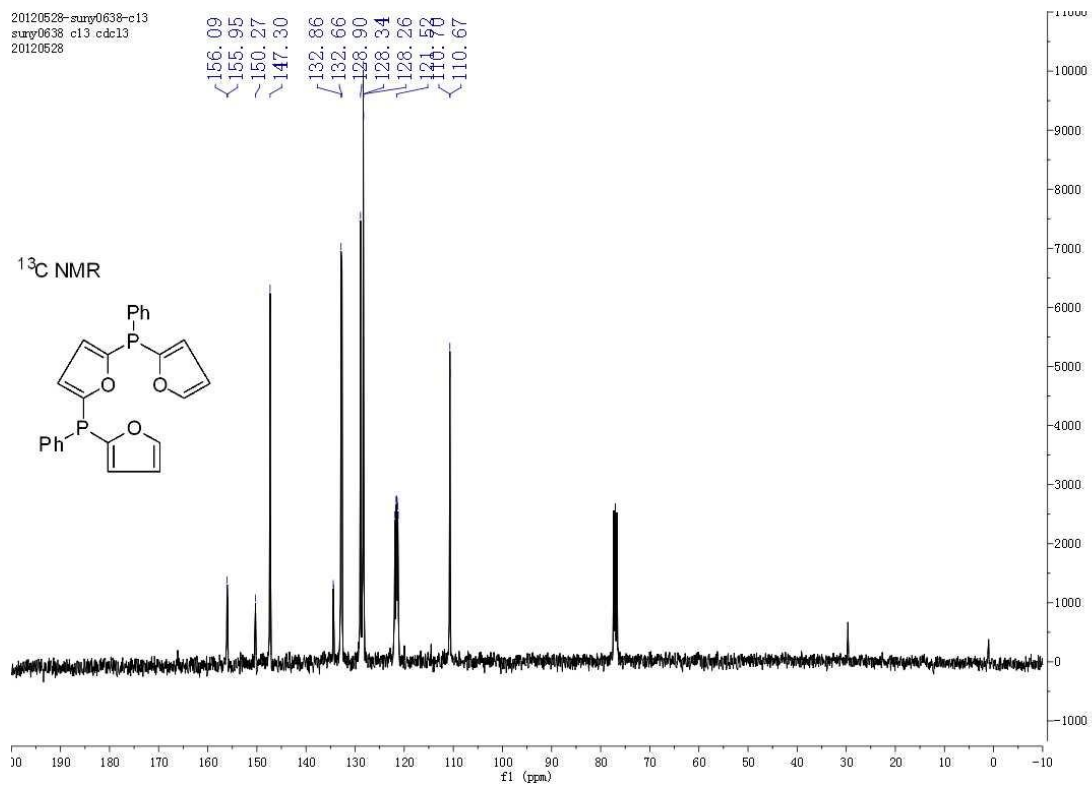

sluy065c cdcl3  
R1210329

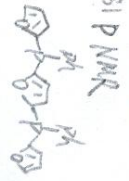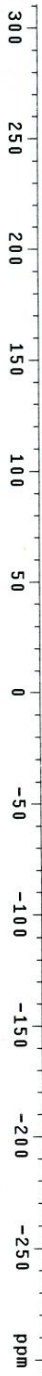

-53.045

**$^{31}\text{P}$  NMR spectra of the reaction mixture about possible mechanism for the formation of 1.**

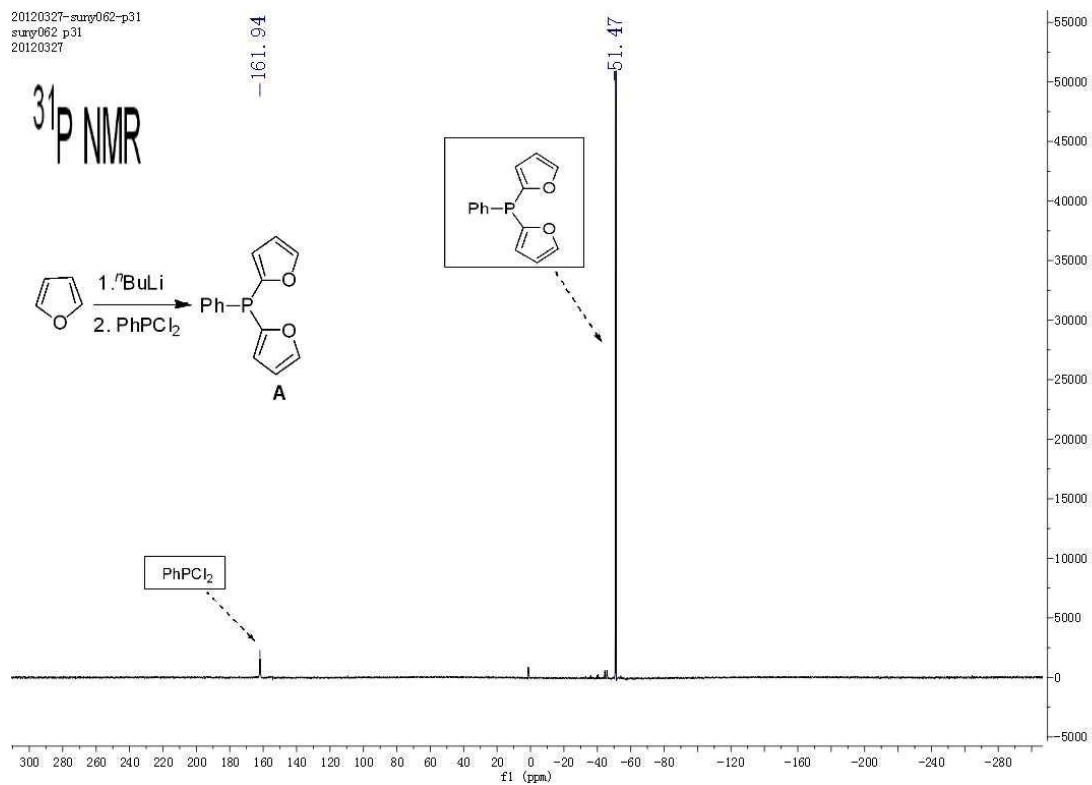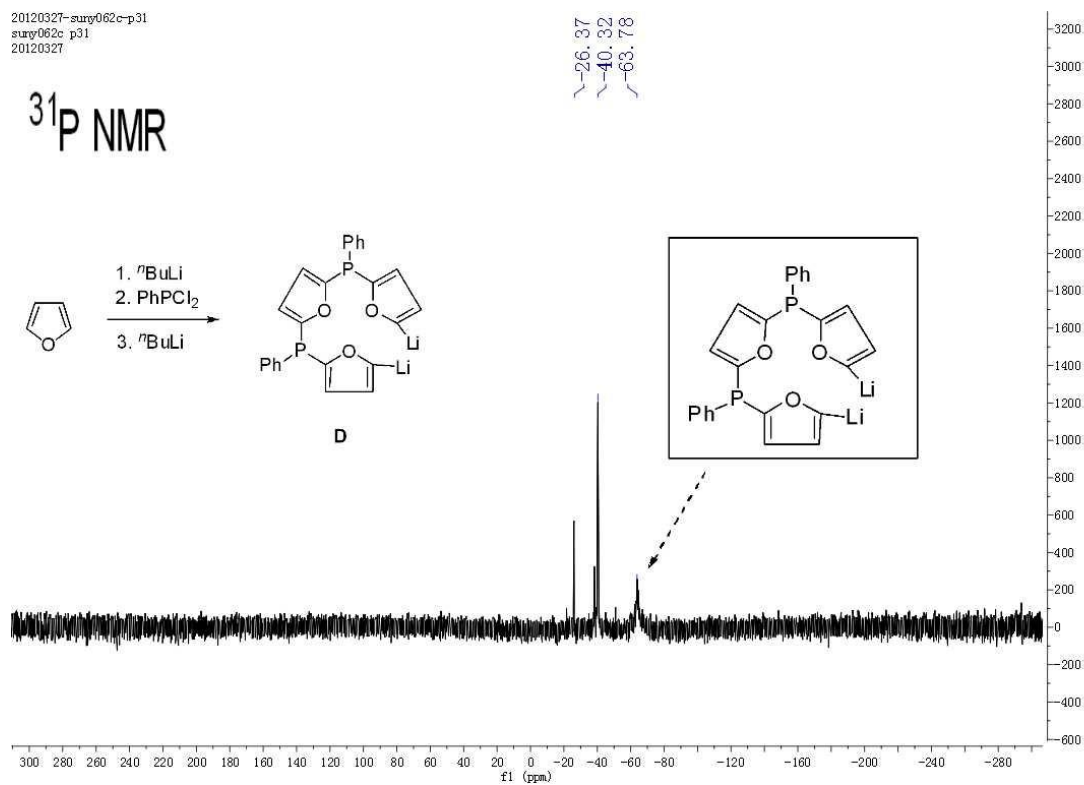

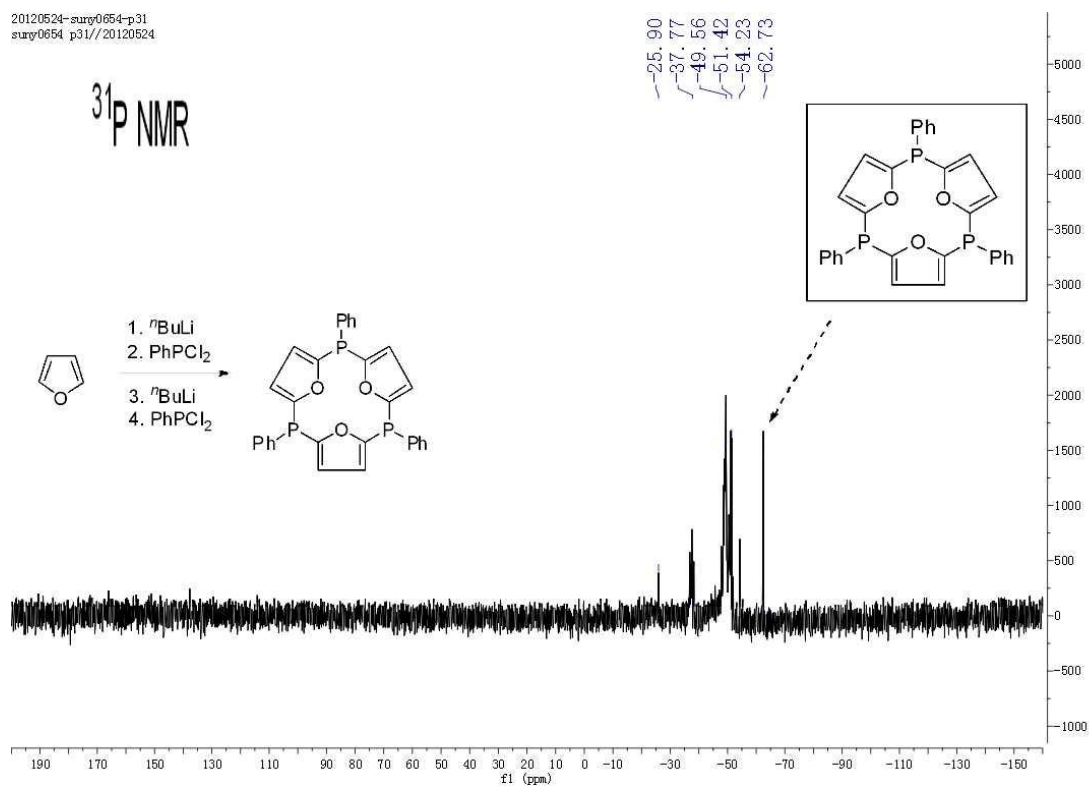

## $^1\text{H}$ NMR and $^{13}\text{P}$ NMR spectra of **5**

### $^1\text{H}$ NMR of **5** (400 MHz, $\text{DMSO-}d_6$ )

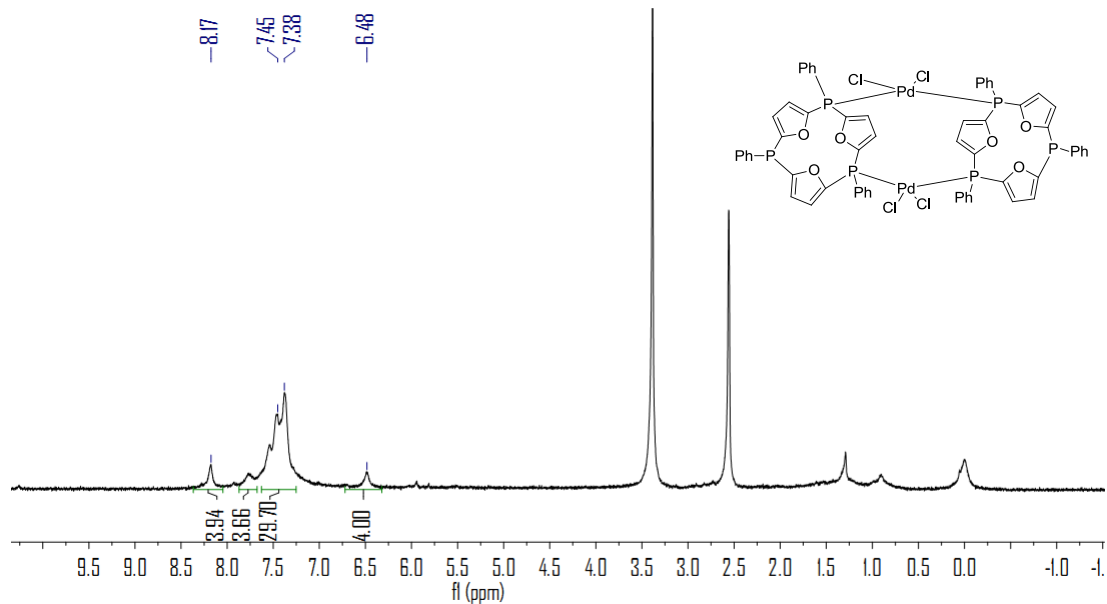



**$^{13}\text{P}$  NMR of 5 (162 MHz,  $\text{DMSO-}d_6$ )**

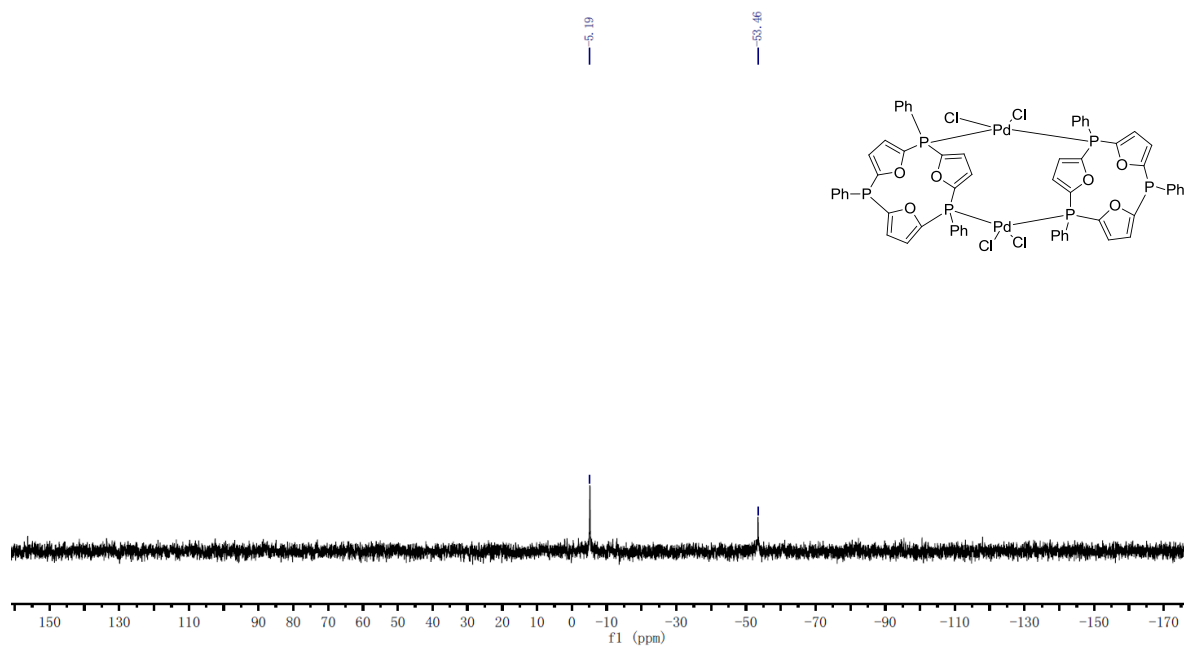

## <sup>1</sup>H NMR spectra of Suzuki-Miyaura coupling Products

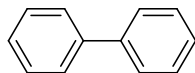

1,1'-biphenyl,

<sup>1</sup>H NMR (400 MHz, CDCl<sub>3</sub>): δ 7.59 (d, *J* = 8.0 Hz, 4H), 7.43 (t, *J* = 8.0 Hz, 4H), 7.34 (t, *J* = 8.0 Hz, 2H) ppm. Data is consistent with that reported in the literature.<sup>1</sup>

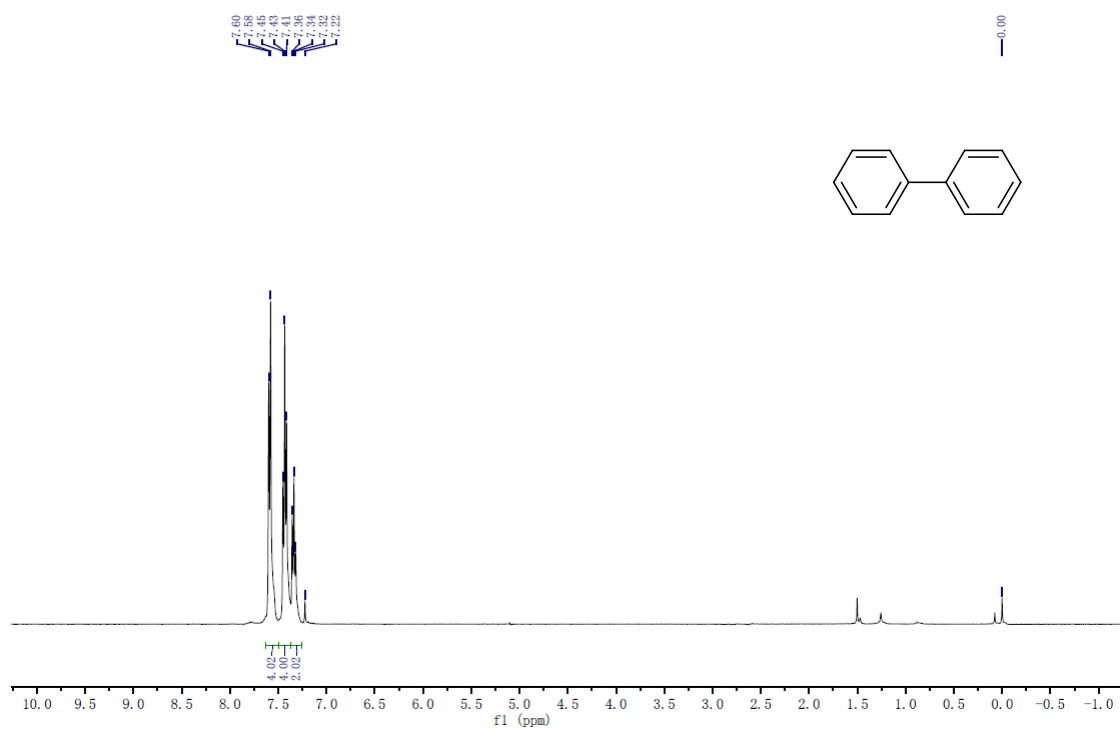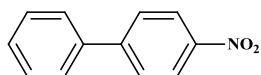

4-nitro-1,1'-biphenyl,

<sup>1</sup>H NMR (400 MHz, CDCl<sub>3</sub>): δ 8.30 (d, *J* = 8.0 Hz, 2H), 7.74 (d, *J* = 8.0 Hz, 2H), 7.63 (d, *J* = 8.0 Hz, 2H), 7.50-7.45 (m, 3H) ppm. Data is consistent with that reported in the literature.<sup>2</sup>

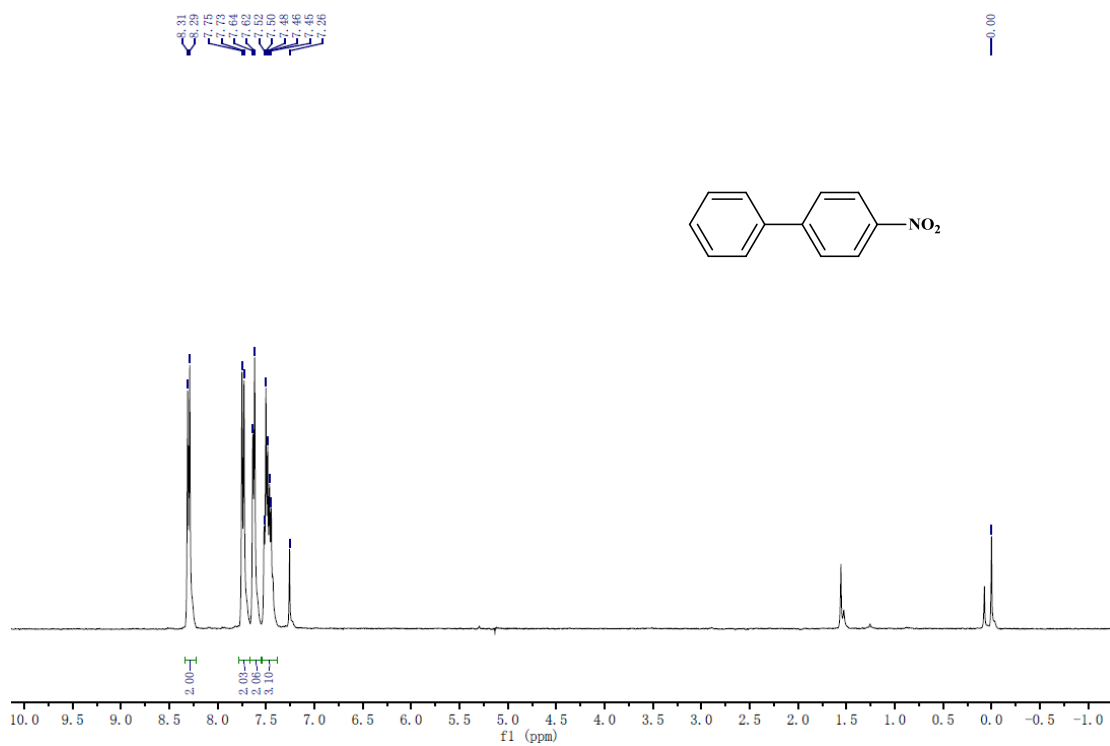

Chemical structure: c1ccc(cc1)-c2ccc(cc2)OC

4-Methoxybiphenyl,  
<sup>1</sup>H NMR (400 MHz, CDCl<sub>3</sub>): δ 7.56-7.52 (m, 4H), 7.40 (t, *J* = 6.0 Hz, 1H), 6.98 (d, *J* = 8.8 Hz, 2H), 3.85 (s, 3H) ppm. Data is consistent with that reported in the literature.<sup>3</sup>

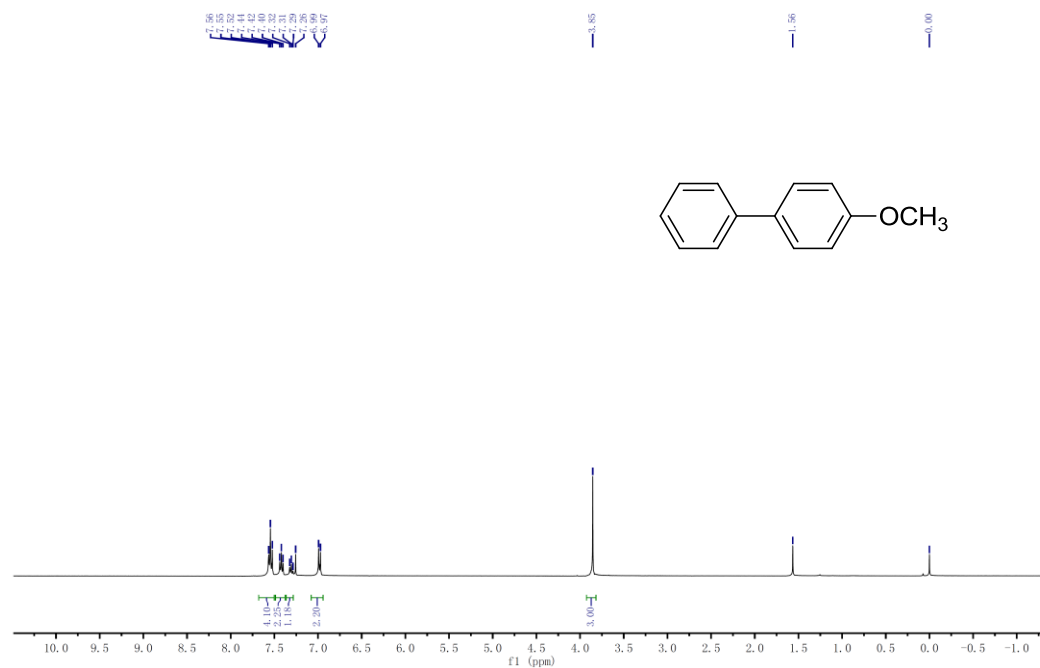

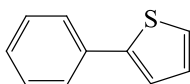

2-phenylthiophene,

$^1\text{H}$  NMR (400 MHz,  $\text{CDCl}_3$ ):  $\delta$  7.62-7.59 (m, 2H), 7.39-7.27 (m, 5H), 7.09 (d,  $J = 4.0$  Hz, 1H) ppm. Data is consistent with that reported in the literature.<sup>4</sup>

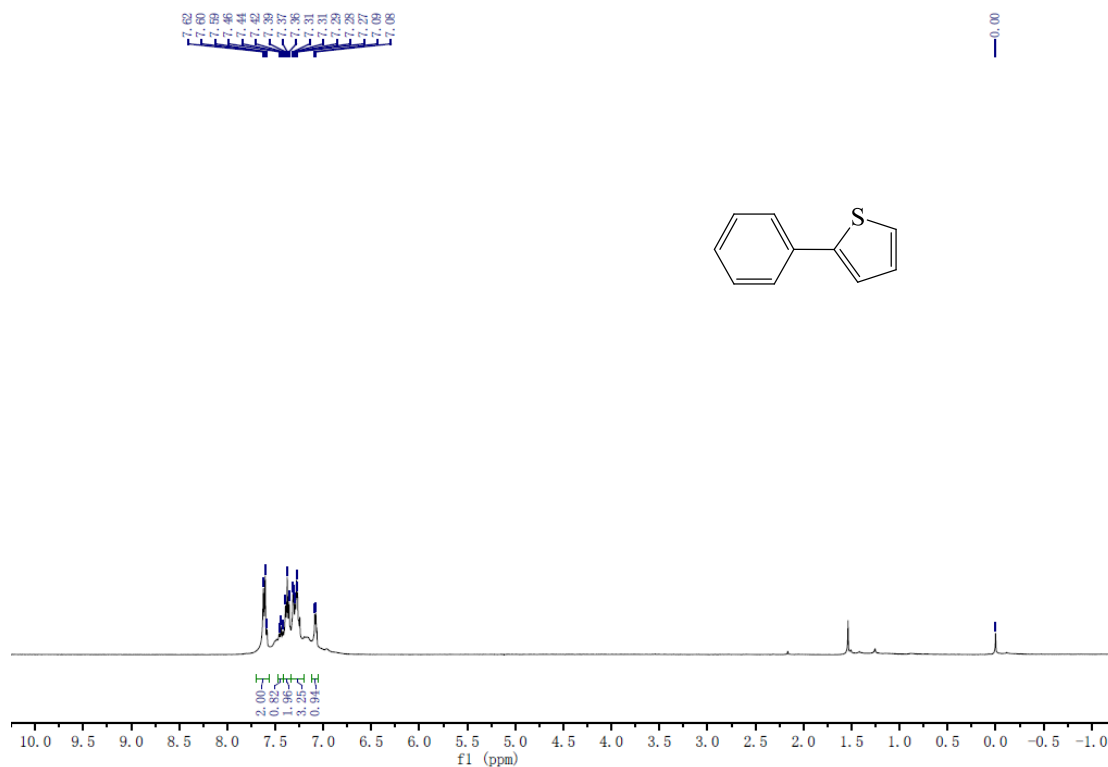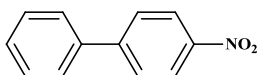

4-nitro-1,1'-biphenyl,

$^1\text{H}$  NMR (400 MHz,  $\text{CDCl}_3$ ):  $\delta$  8.30 (d,  $J = 8.0$  Hz, 2H), 7.74 (d,  $J = 8.0$  Hz, 2H), 7.63 (d,  $J = 8.0$  Hz, 2H), 7.50-7.45 (m, 3H) ppm. Data is consistent with that reported in the literature.<sup>2</sup>

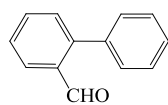

[1,1'-biphenyl]-2-carbaldehyde,

<sup>1</sup>H NMR (400 MHz, CDCl<sub>3</sub>):  $\delta$  9.99 (s, 1H), 8.03 (d,  $J$  = 8.0 Hz, 1H), 7.65 (t,  $J$  = 6.0 Hz, 1H), 7.52-7.45 (m, 5H), 7.39 (d,  $J$  = 8.0 Hz, 2H). Data is consistent with that reported in the literature.<sup>5</sup>

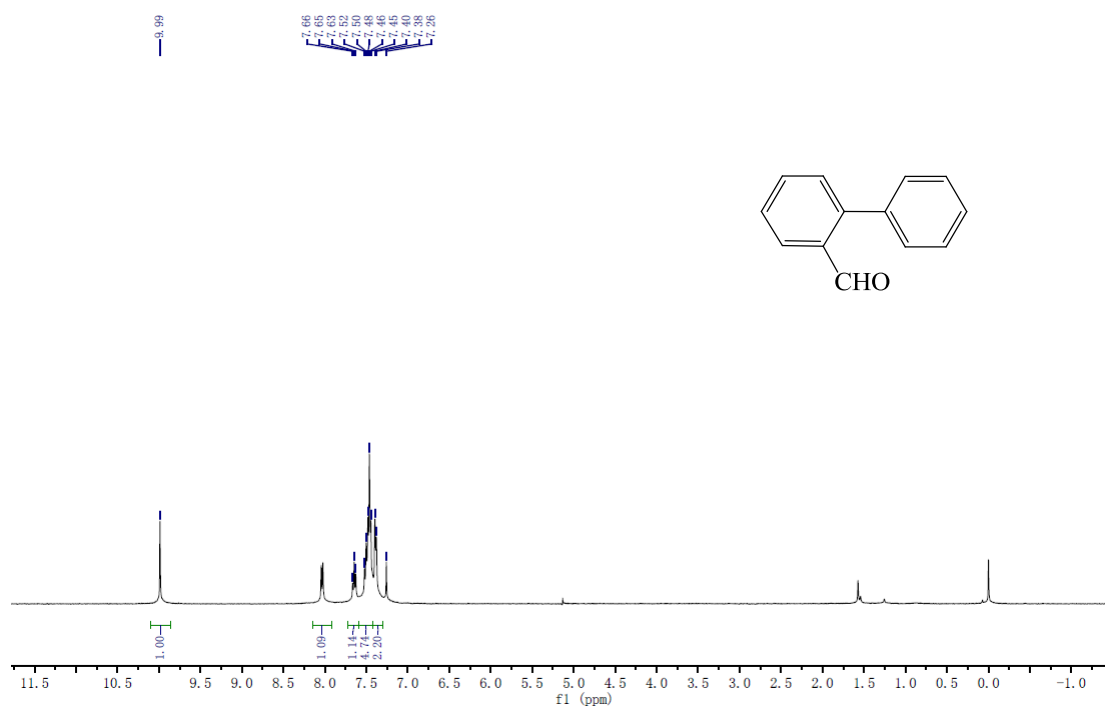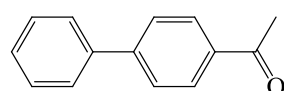

1-([1,1'-biphenyl]-4-yl)ethanone,

<sup>1</sup>H NMR (400 MHz, CDCl<sub>3</sub>): δ 8.04 (d, *J* = 8.0 Hz, 2H), 7.69 (d, *J* = 8.0 Hz, 2H), 7.63 (d, *J* = 8.0 Hz, 2H), 7.47 (t, *J* = 6.0 Hz, 2H), 7.40 (t, *J* = 8.0 Hz, 1H), 2.64 (s, 3H).

Data is consistent with that reported in the literature.<sup>6</sup>

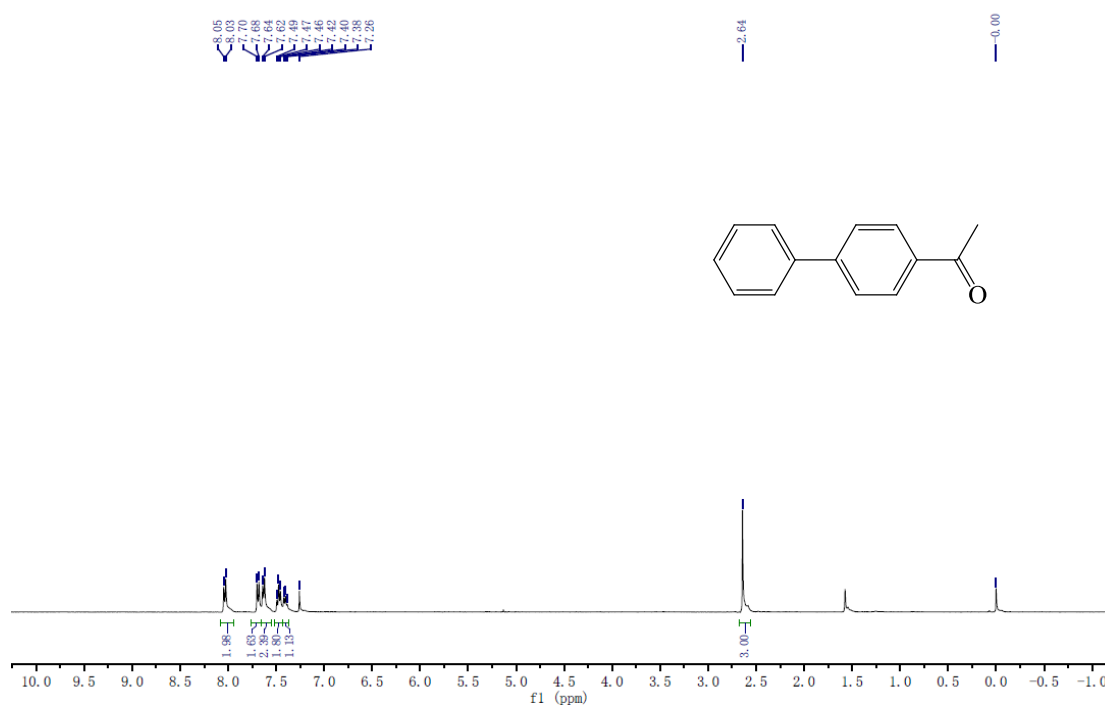

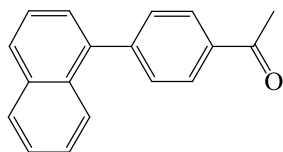

1-(4-(naphthalen-1-yl)phenyl)ethanone,

$^1\text{H NMR}$  (400 MHz,  $\text{CDCl}_3$ ):  $\delta$  8.09 (br, 2H), 7.92 (br, 2H), 7.85 (br, 1H), 7.62 (br, 2H), 7.52 (br, 2H), 2.69 (s, 3H). Data is consistent with that reported in the literature.<sup>7</sup>

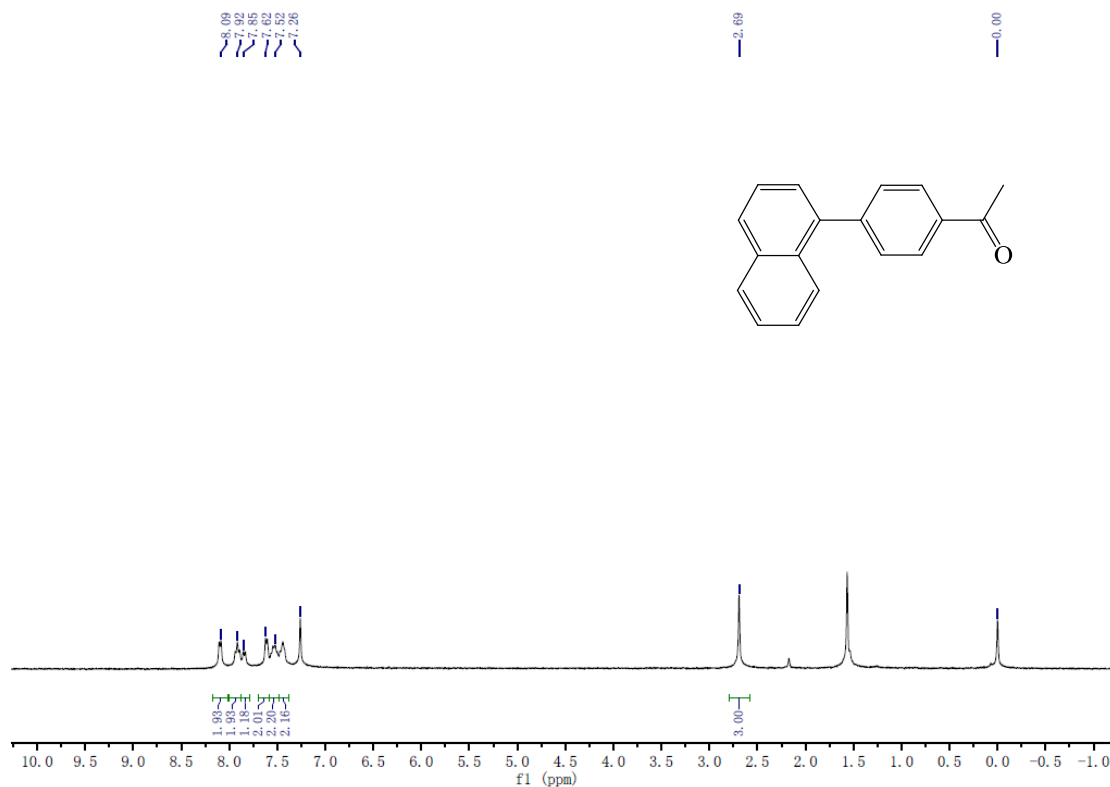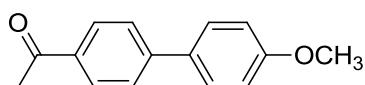

1-(4'-Methoxy-[1,1'-biphenyl]-4-yl) ethanone,

$^1\text{H NMR}$  (400 MHz,  $\text{CDCl}_3$ ):  $\delta$  8.01 (d,  $J = 7.2$  Hz, 2H), 7.65 (d,  $J = 7.2$  Hz, 2H), 7.59 (d,  $J = 7.2$  Hz, 2H), 7.01 (d,  $J = 7.6$  Hz, 2H), 3.87 (s, 3H), 2.64 (s, 3H) ppm. Data is consistent with that reported in the literature.<sup>8</sup>

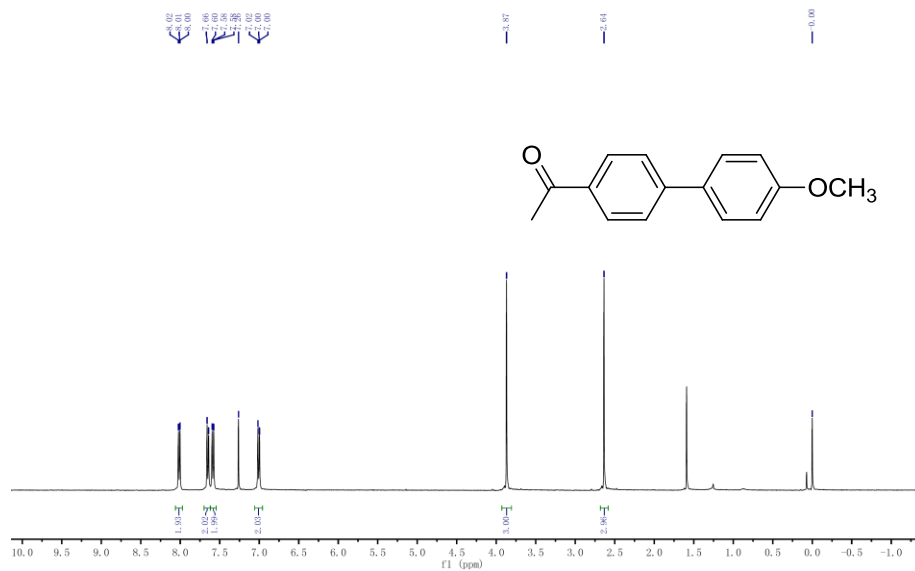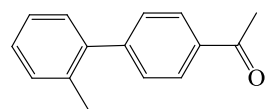

1-(2'-methyl-[1,1'-biphenyl]-4-yl)ethanone,  
<sup>1</sup>H NMR (400 MHz, CDCl<sub>3</sub>): δ 8.01 (d,  $J = 8.0$  Hz, 2H), 7.43 (d,  $J = 8.0$  Hz, 2H), 7.29-7.23 (m, 4H), 2.65 (s, 3H), 2.27 (s, 3H). Data is consistent with that reported in the literature.<sup>9</sup>

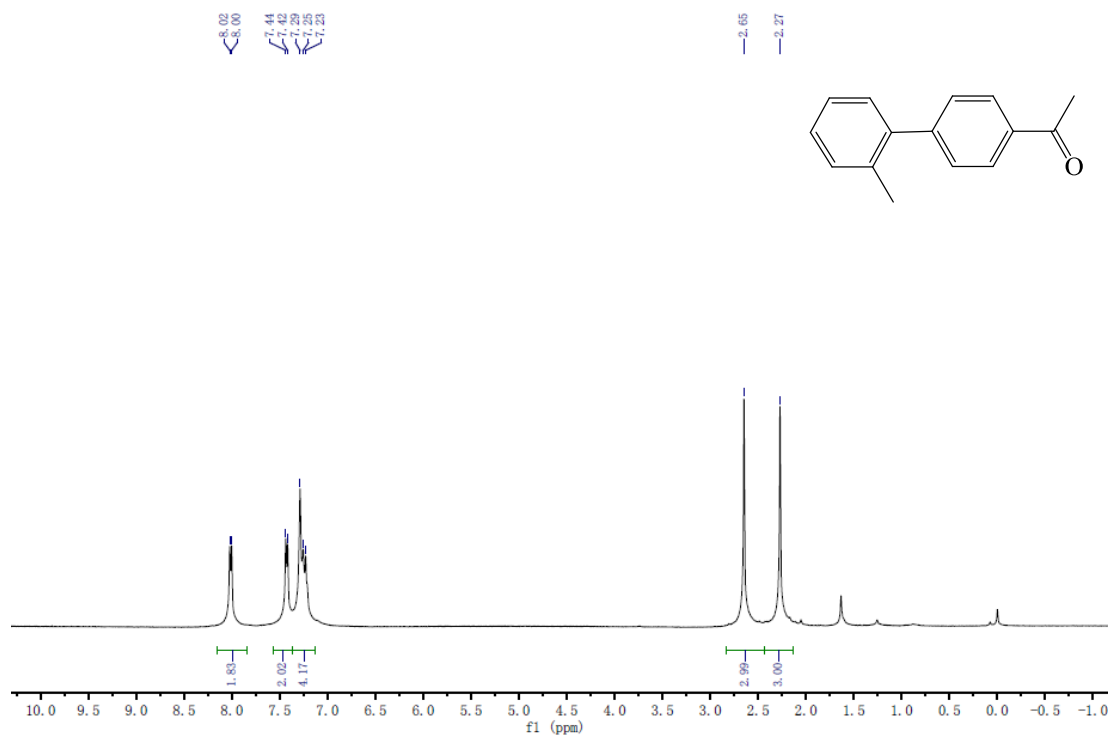



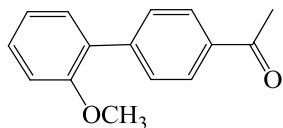

1-(2'-methoxy-[1,1'-biphenyl]-4-yl)ethanone,

$^1\text{H NMR}$  (400 MHz,  $\text{CDCl}_3$ ):  $\delta$  8.00 (d,  $J = 8.0$  Hz, 2H), 7.63 (d,  $J = 8.0$  Hz, 2H), 7.34 (t,  $J = 8.0$  Hz, 2H), 7.05-6.99 (m, 2H), 3.82 (s, 3H), 2.63 (s, 3H). Data is consistent with that reported in the literature.<sup>6</sup>

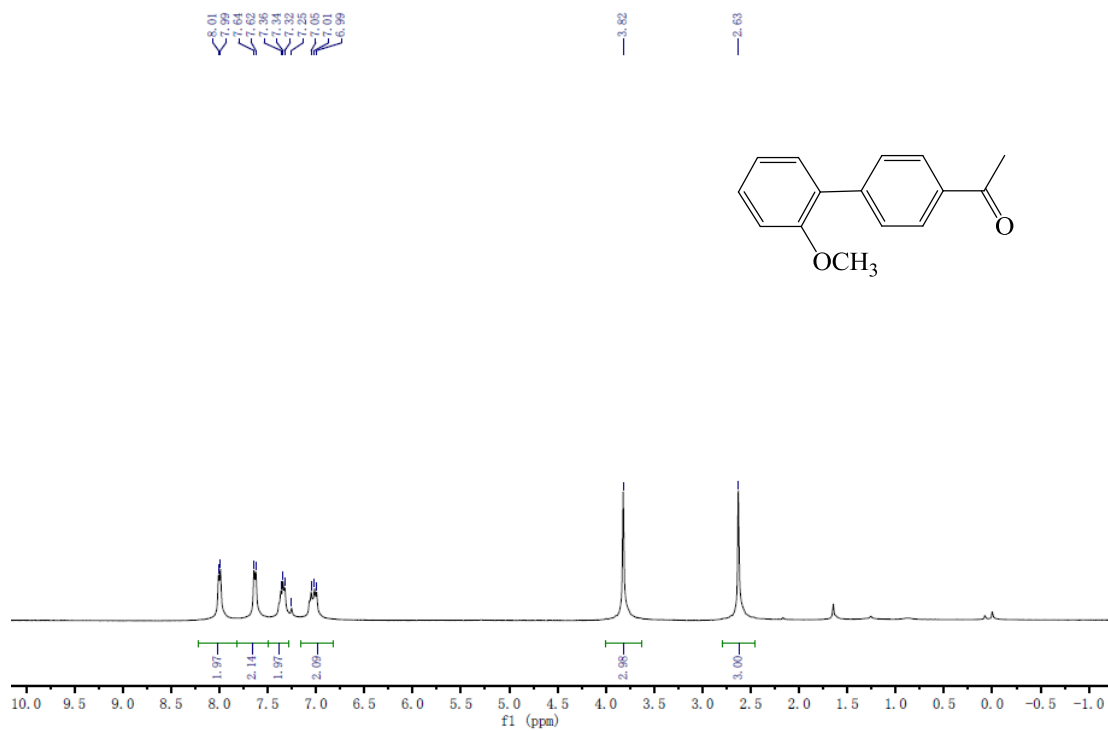

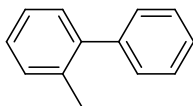

2-methyl-1,1'-biphenyl

$^1\text{H}$  NMR (400 MHz,  $\text{CDCl}_3$ ):  $\delta$  7.43-7.24 (m, 9H), 2.27 (s, 3H) ppm. Data is consistent with that reported in the literature.<sup>10</sup>

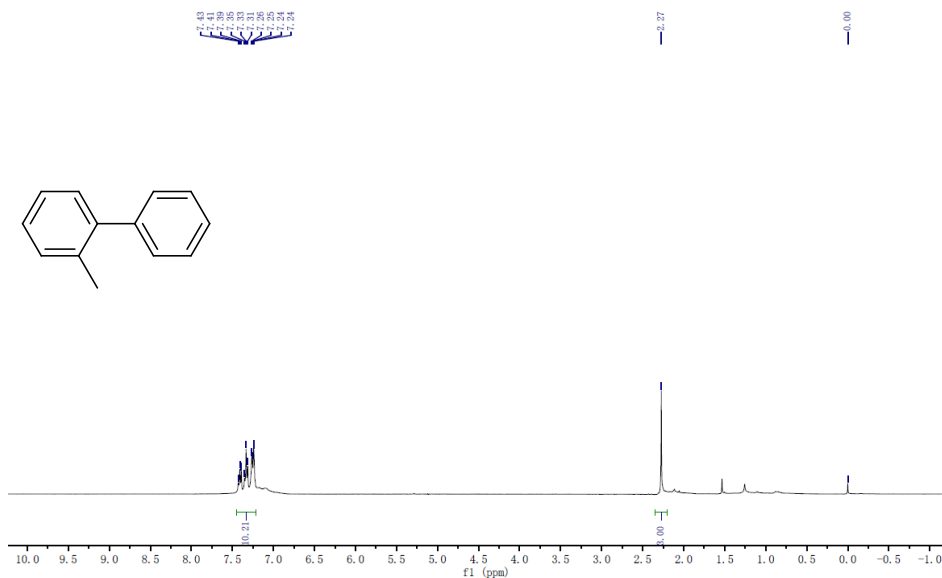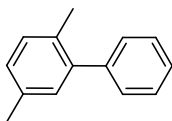

2,5-dimethyl-1,1'-biphenyl

$^1\text{H}$  NMR (600 MHz,  $\text{CDCl}_3$ ):  $\delta$  7.40-7.38 (m, 2H), 7.33-7.30 (m, 3H), 7.16 (d,  $J = 12.0$  Hz, 1H), 7.07-7.06 (d, 2H), 2.34 (s, 3H), 2.22 (s, 3H) ppm. Data is consistent with that reported in the literature.<sup>11</sup>

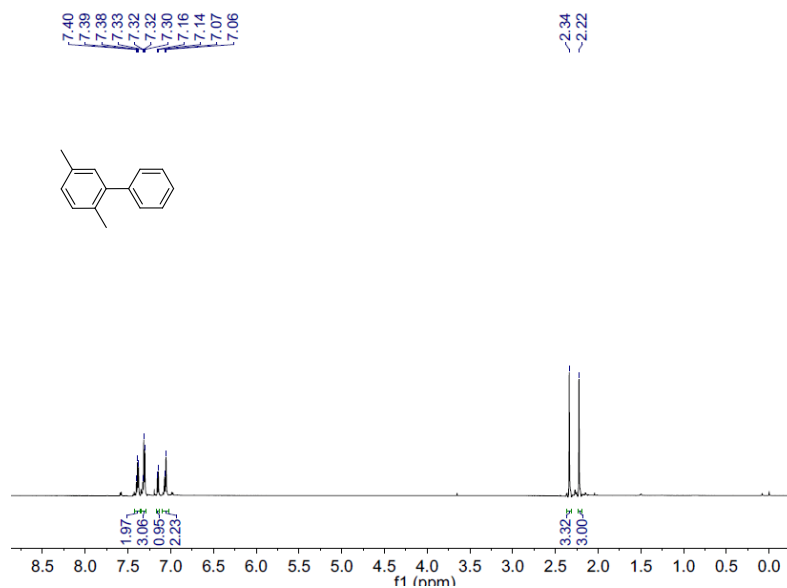

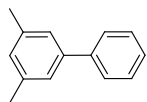

3,5-dimethyl-1,1'-biphenyl

$^1\text{H NMR}$  (400 MHz,  $\text{CDCl}_3$ ):  $\delta$  7.60 (d,  $J = 8.0$  Hz, 2H), 7.45-7.41 (m, 2H), 7.36-7.34 (d,  $J = 8.0$  Hz, 1H), 7.23 (s, 2H), 7.01 (s, 1H), 2.40 (s, 6H). Data is consistent with that reported in the literature.<sup>12</sup>

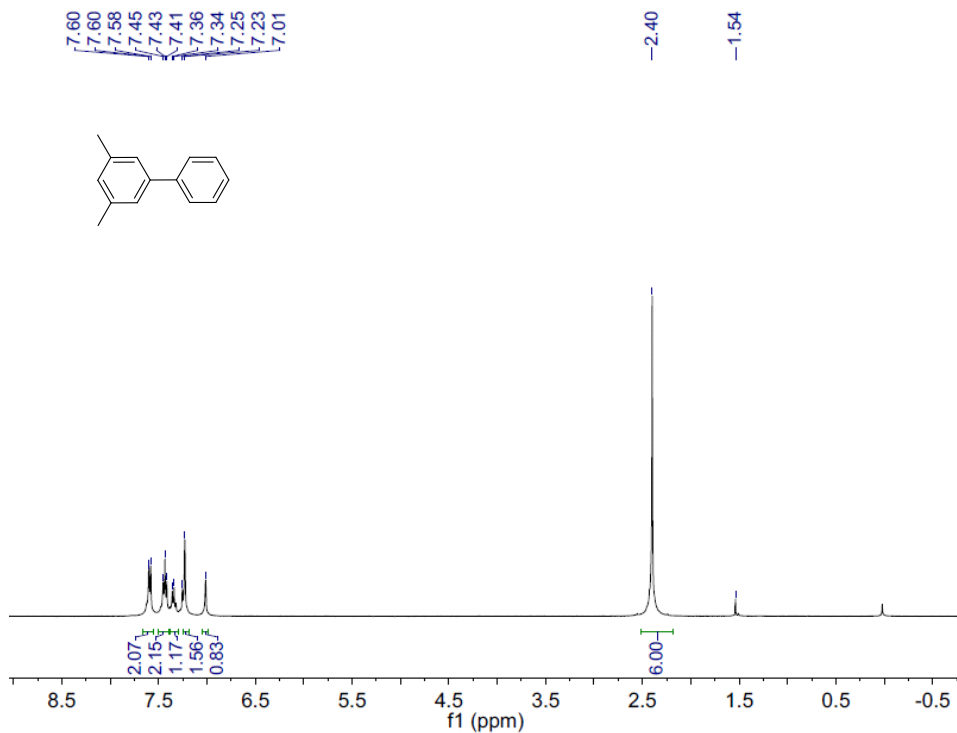

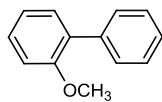

2-methoxy-1,1'-biphenyl

$^1\text{H}$  NMR (600 MHz,  $\text{CDCl}_3$ ):  $\delta$  7.53-7.52 (t, 2H), 7.41-7.39 (m, 2H), 7.32-7.31 (m, 3H), 7.02 (s, 1H), 6.98-6.96 (d,  $J = 12.0$  Hz, 1H), 3.79 (s, 3H). Data is consistent with that reported in the literature.<sup>13</sup>

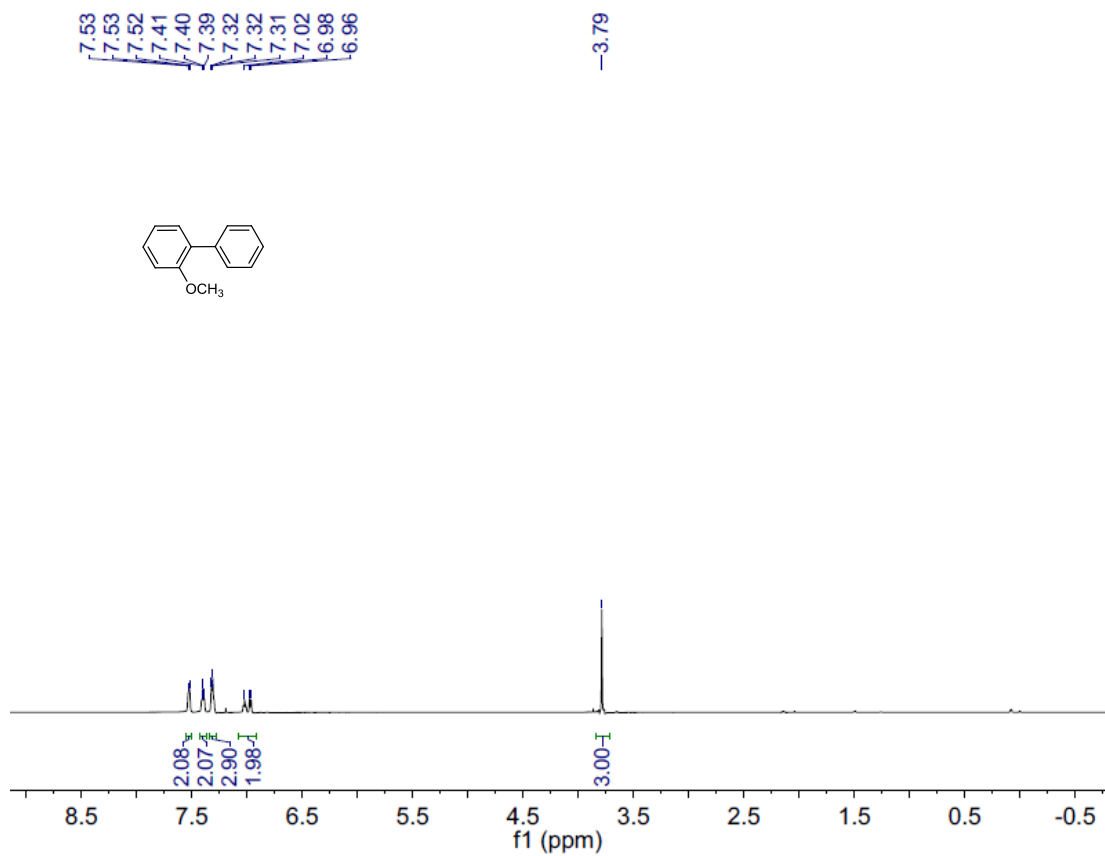

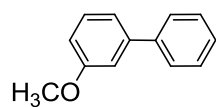

### 3-methoxy-1,1'-biphenyl

$^1\text{H}$  NMR (400 MHz,  $\text{CDCl}_3$ ):  $\delta$  7.60-7.58 (d, 2H), 7.45-7.41 (m, 2H), 7.35-7.33 (m, 2H), 7.19-7.17 (d,  $J = 8.0$  Hz, 1H), 7.13 (s, 1H), 6.91-6.88 (m, 1H), 3.86 (s, 3H). Data is consistent with that reported in the literature.<sup>9</sup>

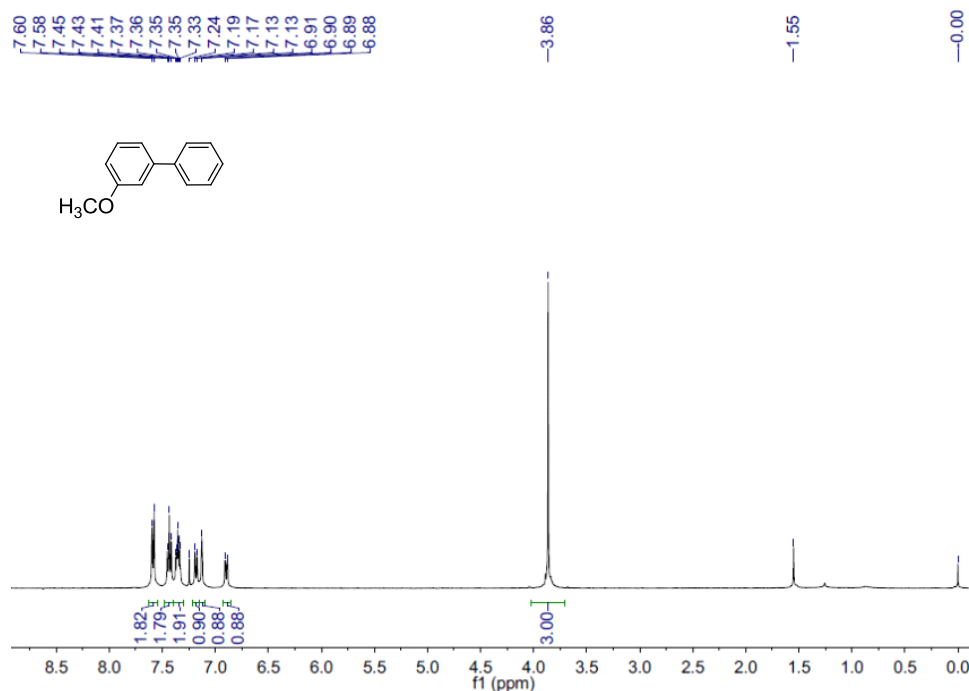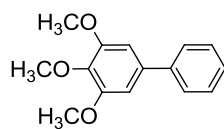

### 3,4,5-trimethoxy-1,1'-biphenyl

$^1\text{H}$  NMR (400 MHz,  $\text{CDCl}_3$ ):  $\delta$  7.57-7.54 (m, 2H), 7.45-7.41 (m, 2H), 7.36-7.34 (d,  $J = 8.0$  Hz, 1H), 6.78 (s, 2H), 3.93 (s, 6H), 3.89 (s, 3H). Data is consistent with that reported in the literature.<sup>14</sup>

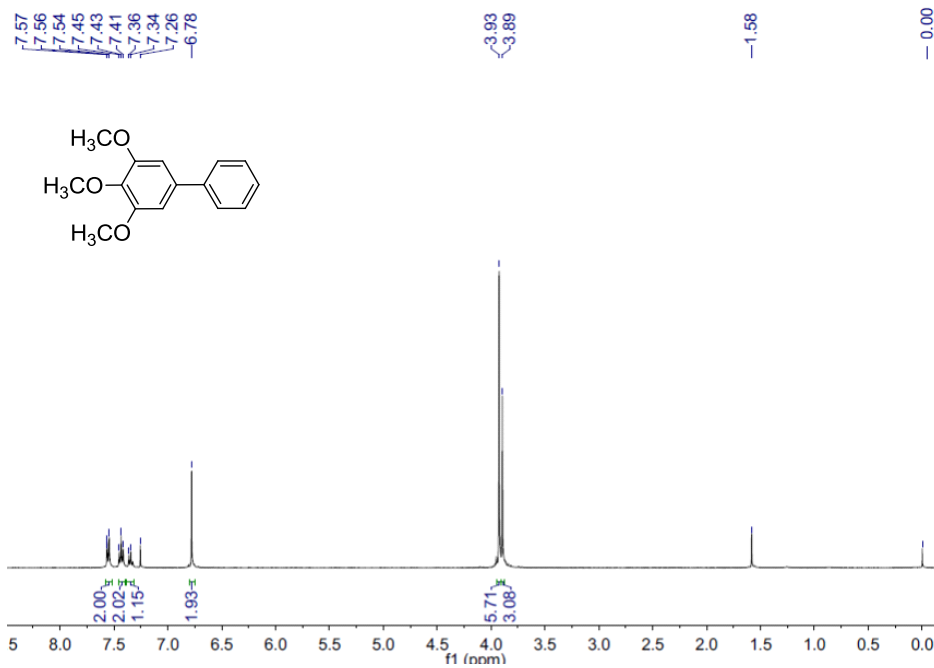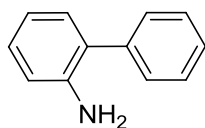

[1,1'-biphenyl]-2-amine

<sup>1</sup>H NMR (400 MHz, CDCl<sub>3</sub>): δ 7.46-7.44 (m, 4H), 7.36-7.34 (m, 1H), 7.18-7.12 (m, 2H), 6.85-6.81 (m, 1H), 6.78-6.76 (d, *J* = 8.0 Hz, 1H), 3.75 (s, 2H). Data is consistent with that reported in the literature.<sup>9</sup>

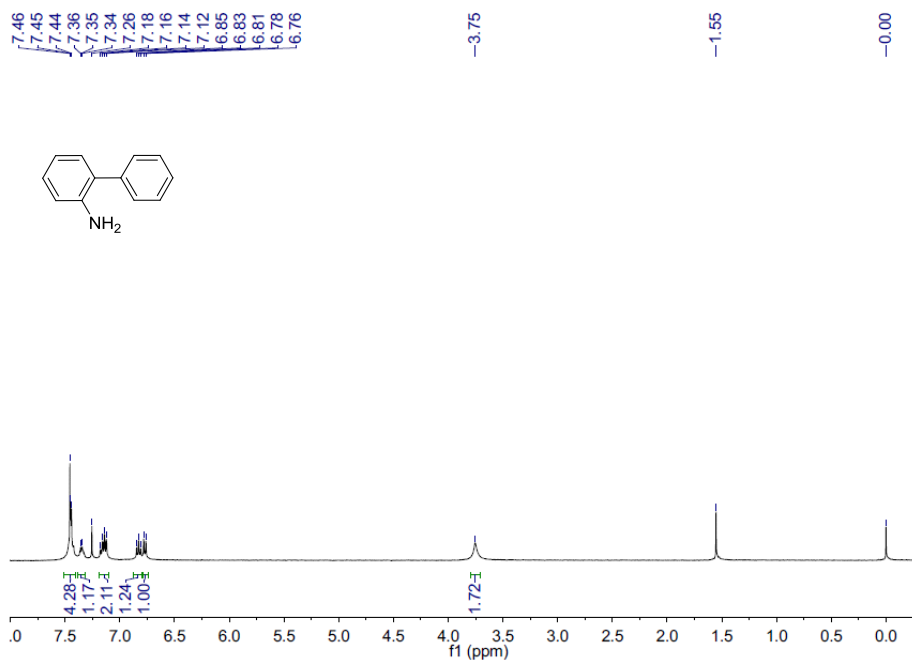

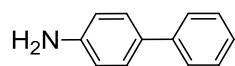

[1,1'-biphenyl]-4-amine

$^1\text{H}$  NMR (600 MHz,  $\text{CDCl}_3$ ):  $\delta$  7.54-7.53 (d,  $J = 6.0$  Hz, 2H), 7.42-7.41 (m, 4H), 7.28-7.27 (d,  $J = 6.0$  Hz, 1H), 6.77-6.75 (m, 2H), 3.72 (s, 2H). Data is consistent with that reported in the literature.<sup>15</sup>

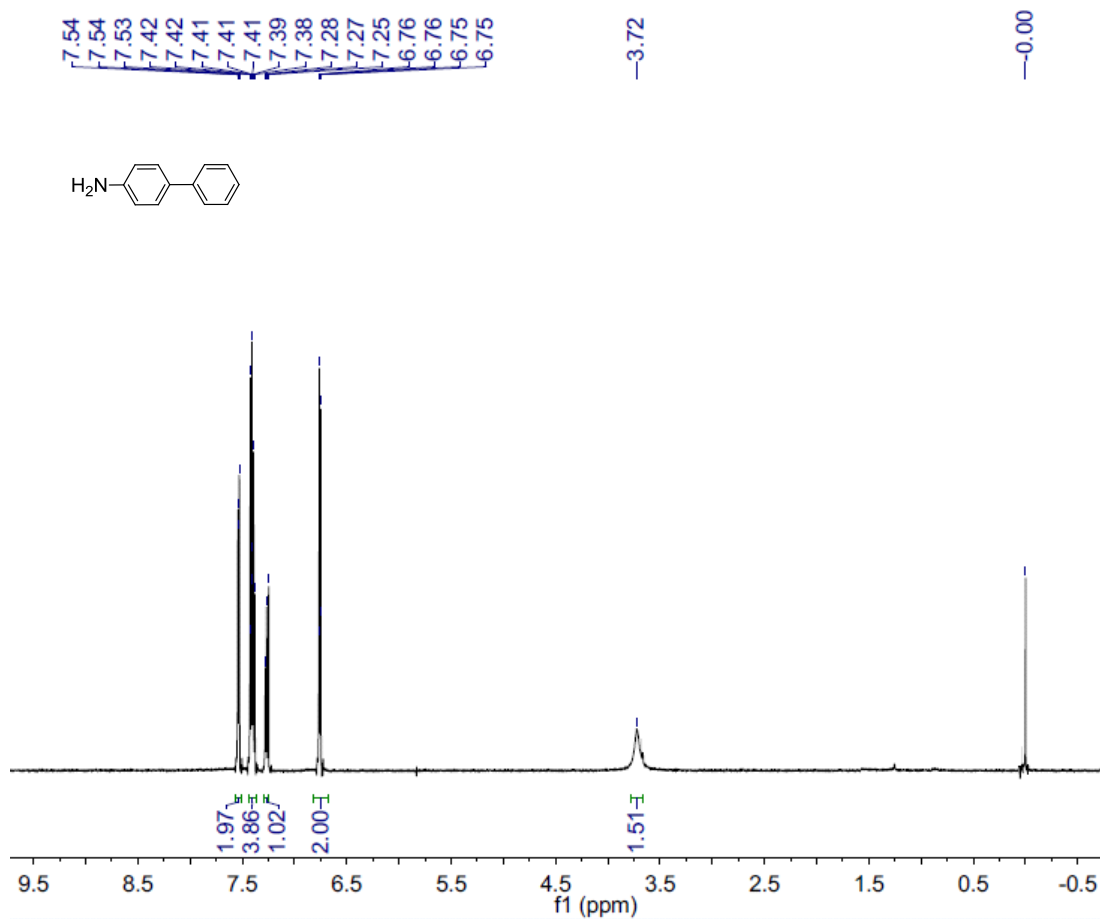

## References

1. Q. Du, W. Zhang, H. Ma, J. Zheng, B. Zhou and Y. Li, *Tetrahedron.*, 2012, **68**, 3577.
2. P. Mao, L. Yang, Y. Xiao, J. Yuan, X. Liu and M. Song, *J. Organomet. Chem.*, 2012, **705**, 39.
3. N. Liu and Z. X. Wang, *J. Org. Chem.*, 2011, **76**, 10031.
4. M.-T. Chen, D. A. Vicic, M. L. Turner and O. Navarro, *Organometallics*, 2011, **30**, 5052.
5. B. Mu, J. Li, Z. Han and Y. Wu, *J. Organomet. Chem.*, 2012, **700**, 117.
6. V. Farina, B. Krishnan, D. R. Marshall and G. P. Roth, *J. Org. Chem.*, 1993, **58**, 5434.
7. C. M. So, C. P. Lau and F. Y. Kwong, *Org. Lett.*, 2007, **9**, 2795.
8. P. Leowanawat, N. Zhang, A. M. Resmerita, B. M. Rosen and V. Percec, *J. Org. Chem.*, 2011, **76**, 9946.
9. E. Ullah, J. McNulty, M. Sliwinski and A. Robertson, *Tetrahedron Lett.*, 2012, **53**, 3990.
10. S. L. Mao, Y. Sun, G. A. Yu, C. Zhao, Z.J. Han, J. Yuan, X. L. Zhu, Q. H. Yang and S. H. Liu, *Org. Biomol. Chem.*, 2012, **10**, 9410.
11. Q. Dai, W. Z. Gao, D. Liu, L. M. Kapes and X. M. Zhang, *J. Org. Chem.*, 2006, **71**, 3928.
12. Y. X. Huang, M. E. Moret, J. M. Robertus and K. Gebbink, *Eur. J. Org. Chem.*, **2014**, 3788.
13. C. Liu, X. M. Li, Z. M. Gao, X. N. Wang and Z. L. Jin, *Tetrahedron*, 2015, **71**, 3954.
14. C. M. Boehner, E. C. Frye, K. M. G. Connell, W. R. J. D. Galloway, H. F. Sore, P. G. Dominguez, D. Norton, D. G. Hulcoop, M. Owen, G. Turner, C. Crawford, H. Horsley and D. R. Spring, *Chem. Eur. J.*, 2011, **17**, 13230.
15. M. Charbonneau, G. Addoumieh, P. Oguadinma and A. R. Schmitzer, *Organometallics*, 2014, **33**, 6544.
